# Supplementary material for: Design, Synthesis and Antiparasitic Evaluation of Click Phospholipids
Source: MDPI journal article supplement (doi:10.3390/molecules26144204), 2021-07-10
Supplement: s1 [file s1]

Supplementary Material

# Design, Synthesis and Antiparasitic Evaluation of Click Phospholipids

George E. Magoulas <sup>1,†</sup>, Pantelis Afroudakis <sup>1,†</sup>, Kalliopi Georgikopoulou <sup>1</sup>, Marina Roussaki <sup>1</sup>, Chiara Borsari <sup>2</sup>, Theano Fotopoulou <sup>1</sup>, Nuno Santarem <sup>3,4</sup>, Emile Barrias <sup>5,6</sup>, Paloma Tejera Nevado <sup>7</sup>, Julia Hachenberg <sup>7</sup>, Eugenia Bifeld <sup>7</sup>, Bernhard Ellinger <sup>8,9</sup>, Maria Kuzikov <sup>8,9</sup>, Irini Fragiadaki <sup>10</sup>, Effie Scoullica <sup>10</sup>, Joachim Clos <sup>7</sup>, Sheraz Gul <sup>8,9</sup>, Maria Paola Costi <sup>11</sup>, Wanderley de Souza <sup>5,6</sup>, Kyriakos C. Prousis <sup>1</sup>, Anabela Cordeiro da Silva <sup>3,4,12</sup> and Theodora Calogeropoulou <sup>1,\*</sup>

- <sup>1</sup> National Hellenic Research Foundation, Institute of Chemical Biology, 11653 Athens, Greece; gmagoulas@eie.gr (G.E.M.); pafroudakischem@yahoo.gr (P.A.); k.georgikopoulou@access-one.gr (K.G.); mroussaki@eie.gr (M.R.); tfotop@eie.gr (T.F.); kyrprousis@eie.gr (K.C.P.)
  - <sup>2</sup> Department of Biomedicine, University of Basel, 4058 Basel, Switzerland; chiara.borsari@unibas.ch
  - <sup>3</sup> i3S—Instituto de Investigação e Inovação em Saúde, Universidade do Porto, 4200 -135 Porto, Portugal; santarem@ibmc.up.pt (N.S.); cordeiro@ibmc.up.pt (A.C.d.S.)
  - <sup>4</sup> Parasite Disease Group, IBMC-Instituto de Biologia Molecular e Celular, 4150-180 Porto, Portugal
  - <sup>5</sup> Instituto Nacional de Ciência e Tecnologia em Biologia Estrutural e Bioimagens, Universidade Federal do Rio de Janeiro, 21941-902 Rio de Janeiro, Brazil; emilebarrias@gmail.com (E.B.); wsouza@biof.ufrj.br (W.d.S.)
  - <sup>6</sup> Instituto de Biofísica Carlos Chagas Filho, Universidade Federal do Rio de Janeiro, Ilha do Fundão, 21941-902 Rio de Janeiro, Brazil
  - <sup>7</sup> Bernhard Nocht Institute for Tropical Medicine, D-20359 Hamburg, Germany; paloma.tejera.nevado@gu.se (P.T.N.); Julia.Hachenberg@amedes-group.com (J.H.); bifeld@bnitm.de (E.B.); clos@bni-hamburg.de (J.C.)
  - <sup>8</sup> Fraunhofer Institute for Translational Medicine and Pharmacology ITMP, 22525 Hamburg, Germany; Bernhard.Ellinger@itmp.fraunhofer.de (B.E.); Maria.Kuzikov@itmp.fraunhofer.de (M.K.); Sheraz.Gul@itmp.fraunhofer.de (S.G.)
  - <sup>9</sup> Fraunhofer Cluster of Excellence for Immune-Mediated Diseases CIMD, 22525 Hamburg, Germany
  - <sup>10</sup> Department of Clinical Microbiology and Microbial Pathogenesis, Faculty of Medicine, University of Crete, 70013 Heraklion, Crete, Greece; fragiada@med.uoc.gr (I.F.); e.scoullica@uoc.gr (E.S.)
  - <sup>11</sup> Department of Pharmacy, Università degli Studi di Modena e Reggio Emilia, 41125 Modena, Italy; costi-imp@unimore.it
  - <sup>12</sup> Departamento de Ciências Biológicas, Faculdade de Farmácia, Universidade do Porto, 4099-002 Porto, Portugal
- \* Correspondence: tcalog@eie.gr; Tel.: +30-2107273833
- † These authors have contributed equally to this manuscript.

## Table of Contents

|                                                                                                                                                                                                        |    |
|--------------------------------------------------------------------------------------------------------------------------------------------------------------------------------------------------------|----|
| <b>1. Supplementary Tables</b> .....                                                                                                                                                                   | S2 |
| <b>Table S1.</b> <i>In vitro</i> evaluation of antiparasitic activity against <i>L. infantum</i> (MHOM/TN/80/LEM235) in-tracellular amastigotes.                                                       | S2 |
| <b>Table S2.</b> <i>In vitro</i> evaluation of toxicities (hERG, CYP1A2, CYP2C9, CYP2C19, CYP2D6, CYP3A4 and A549 and WI-38 cytotoxicities) of compounds at 10 µM and Miltefosine (10 µM or 1 µM)..... | S3 |
| <b>Table S3.</b> <i>In vitro</i> evaluation of antiparasitic activity against <i>T. brucei</i> L427 WT blood-stream form.....                                                                          | S3 |
| <b>2. Copies of <sup>1</sup>H, <sup>13</sup>C and <sup>31</sup>P NMR of final products</b> .....                                                                                                       | S5 |

## 1. Supplementary Tables

**Table S1.** *In vitro* evaluation of antiparasitic activity against *L. infantum* (MHOM/TN/80/LEM235) in-tracellular amastigotes.

| Compound    | <i>L. infantum</i><br>MHOM/TN/80/LEM235<br>intracellular amastigotes | Toxicity                                                                | Selectivity Index<br>CC <sub>50</sub> /IC <sub>50</sub> |
|-------------|----------------------------------------------------------------------|-------------------------------------------------------------------------|---------------------------------------------------------|
|             | IC <sub>50</sub> ± SD (μM)                                           | CC <sub>50</sub> ± SD or CC <sub>50</sub> in-<br>terval estimation (μM) |                                                         |
| 25          | 9.33 ± 0.99                                                          | >100                                                                    | 10.7                                                    |
| 26          | 5.21 ± 0.95                                                          | >12.5                                                                   | 2.4                                                     |
| 27          | 1.54 ± 0.22                                                          | 50–100                                                                  | 32.5–64.9                                               |
| 28          | 1.5 ± 0.4                                                            | >100                                                                    | 66.7                                                    |
| 29          | 0.5 ± 0.2                                                            | >100                                                                    | 200                                                     |
| Miltefosine | 6.68±0.96                                                            | 15.9 ± 1.2                                                              | 4.9                                                     |

**Table S2.** *In vitro* evaluation of toxicities (hERG, CYP1A2, CYP2C9, CYP2C19, CYP2D6, CYP3A4 and A549 and WI-38 cytotoxicities) of compounds at 10  $\mu$ M and Miltefosine (10  $\mu$ M or 1  $\mu$ M). N.T. = Not Tested.

| c           | % inhibition $\pm$ SD at 10 $\mu$ M |                    |                   |                   |                    |                   |                   | % cell growth $\pm$ SD at 10 $\mu$ M | % toxicity $\pm$ SD at 10 $\mu$ M | % inhibition $\pm$ SD at 10 $\mu$ M |
|-------------|-------------------------------------|--------------------|-------------------|-------------------|--------------------|-------------------|-------------------|--------------------------------------|-----------------------------------|-------------------------------------|
| Comp.       | hERG                                | CYP1A2             | CYP2C9            | CYP2C19           | CYP2D6             | CYP3A4            | A549              | WI-38                                | Mito-chondria                     | Aurora B                            |
| 25          | -7.70 $\pm$ 10.95                   | -20.41 $\pm$ 7.94  | -23.11 $\pm$ 4.90 | -32.10 $\pm$ 3.43 | -37.71 $\pm$ 9.99  | -20.13 $\pm$ 4.31 | 114.88 $\pm$ 2.04 | 93.46 $\pm$ 9.11                     | 11.05 $\pm$ 4.92                  | -10.28 $\pm$ 19.80                  |
| 28          | -3.64 $\pm$ 5.93                    | -13.84 $\pm$ 9.34  | -23.46 $\pm$ 6.53 | -32.71 $\pm$ 4.81 | -56.57 $\pm$ 9.98  | -33.70 $\pm$ 4.40 | 121.51 $\pm$ 2.96 | 114.04 $\pm$ 25.66                   | 8.99 $\pm$ 15.76                  | -11.71 $\pm$ 9.17                   |
| 29          | -4.90 $\pm$ 5.58                    | -28.56 $\pm$ 5.97  | -22.63 $\pm$ 6.19 | -28.74 $\pm$ 4.48 | -46.97 $\pm$ 17.56 | -33.59 $\pm$ 4.80 | 120.63 $\pm$ 0.86 | 92.93 $\pm$ 15.18                    | 1.08 $\pm$ 2.29                   | -6.17 $\pm$ 7.07                    |
| 30          | N.T.                                | -2.91 $\pm$ 3.00   | 85.98 $\pm$ 0.94  | 74.33 $\pm$ 2.72  | 50.77 $\pm$ 3.64   | 42.47 $\pm$ 8.94  | N.T.              | N.T.                                 | N.T.                              | N.T.                                |
| 31          | -6.43 $\pm$ 13.73                   | 13.80 $\pm$ 0.84   | 8.95 $\pm$ 1.08   | -2.38 $\pm$ 6.77  | 11.06 $\pm$ 1.05   | -7.33 $\pm$ 3.74  | 108.64 $\pm$ 5.73 | 123.63 $\pm$ 6.26                    | 5.07 $\pm$ 4.57                   | N.T.                                |
| 32          | N.T.                                | 12.02 $\pm$ 4.19   | 93.19 $\pm$ 0.78  | 54.87 $\pm$ 3.86  | 83.96 $\pm$ 2.45   | 60.74 $\pm$ 6.21  | N.T.              | N.T.                                 | N.T.                              | N.T.                                |
| 33          | 16.60 $\pm$ 2.64                    | 15.23 $\pm$ 4.45   | 19.72 $\pm$ 2.68  | -4.22 $\pm$ 4.90  | 9.87 $\pm$ 6.48    | 7.61 $\pm$ 9.09   | 114.14 $\pm$ 9.60 | 136.32 $\pm$ 19.05                   | -1 $\pm$ 4.35                     | N.T.                                |
| 34          | N.T.                                | -3.73 $\pm$ 3.31   | 18.94 $\pm$ 3.85  | 4.89 $\pm$ 11.86  | 23.08 $\pm$ 13.73  | 19.27 $\pm$ 3.43  | N.T.              | N.T.                                 | N.T.                              | N.T.                                |
| 35          | 0.10 $\pm$ 4.10                     | 9.42 $\pm$ 1.87    | 2.57 $\pm$ 0.76   | -3.09 $\pm$ 5.40  | 7.26 $\pm$ 1.30    | -8.64 $\pm$ 5.66  | 100.96 $\pm$ 6.64 | 119.10 $\pm$ 5.69                    | 6.58 $\pm$ 11.15                  | N.T.                                |
| 36          | N.T.                                | 3.18 $\pm$ 2.49    | 67.54 $\pm$ 2.08  | 35.51 $\pm$ 4.84  | 58.33 $\pm$ 2.06   | 35.63 $\pm$ 5.11  | N.T.              | N.T.                                 | N.T.                              | N.T.                                |
| 41          | 48.78 $\pm$ 4.00                    | 10.86 $\pm$ 0.71   | 41.31 $\pm$ 8.34  | 5.65 $\pm$ 5.95   | 45.83 $\pm$ 14.78  | 53.97 $\pm$ 5.39  | 85.15 $\pm$ 1.43  | 54.16 $\pm$ 12.05                    | 2.99 $\pm$ 9.19                   | N.T.                                |
| 53          | 8.95 $\pm$ 6.41                     | 20.03 $\pm$ 0.84   | 5.45 $\pm$ 6.65   | -17.22 $\pm$ 1.84 | -26.41 $\pm$ 6.04  | -12.40 $\pm$ 4.93 | 87.74 $\pm$ 2.23  | 83.83 $\pm$ 5.08                     | -1.08 $\pm$ 12.96                 | N.T.                                |
| 54          | 17.93 $\pm$ 5.86                    | 9.37 $\pm$ 0.58    | 37.98 $\pm$ 3.38  | 10.43 $\pm$ 8.37  | 6.07 $\pm$ 11.09   | 13.88 $\pm$ 0.37  | 85.82 $\pm$ 2.06  | 31.39 $\pm$ 17.44                    | 8.56 $\pm$ 12.10                  | N.T.                                |
| 65          | 8.64 $\pm$ 8.38                     | 18.05 $\pm$ 4.21   | 28.32 $\pm$ 5.98  | -1.75 $\pm$ 2.75  | -30.44 $\pm$ 9.48  | -2.44 $\pm$ 12.03 | 90.48 $\pm$ 5.75  | 77.74 $\pm$ 11.47                    | 40.25 $\pm$ 5.67                  | N.T.                                |
| 66          | 22.98 $\pm$ 9.56                    | 12.37 $\pm$ 2.06   | 53.41 $\pm$ 2.53  | 23.97 $\pm$ 7.01  | 53.99 $\pm$ 2.89   | 59.34 $\pm$ 5.31  | 90.83 $\pm$ 8.30  | 49.49 $\pm$ 17.33                    | 19.78 $\pm$ 15.77                 | N.T.                                |
| Miltefosine | -16.92 $\pm$ 7.34                   | -20.62 $\pm$ 11.85 | -0.80 $\pm$ 38.33 | 7.92 $\pm$ 15.50  | 30.83 $\pm$ 16.70  | 8.39 $\pm$ 8.99   | 95.80 $\pm$ 15.78 | 113.50 $\pm$ 26.66                   | 3.99 $\pm$ 8.95                   | -12.54 $\pm$ 10.71                  |

**Table S3.** *In vitro* evaluation of antiparasitic activity against *T. brucei* L427 WT blood-stream form.

| <i>T.b. brucei</i> L427 WT Blood-Stream |                                                                    |                                                     |
|-----------------------------------------|--------------------------------------------------------------------|-----------------------------------------------------|
| Comp.                                   | Single Dose Assay 10 $\mu$ M Mean Inhibitory Activity (%) $\pm$ SD | Dose Response Curves IC <sub>50</sub> $\pm$ SD (nM) |
| 25                                      | N.A                                                                |                                                     |
| 26                                      | N.A                                                                |                                                     |
| 27                                      | N.A                                                                |                                                     |

|                    |             |
|--------------------|-------------|
| 28                 | N.A.        |
| 29                 | N.A.        |
| 30                 | N.A.        |
| 31                 | 20 ± 1      |
| 32                 | 36 ± 4      |
| 33                 | 23 ± 3      |
| 34                 | N.A.        |
| 35                 | N.A.        |
| 36                 | 30 ± 7      |
| 53                 | N.A.        |
| 54                 | N.A.        |
| 65                 | N.A.        |
| 66                 | N.A.        |
| <b>Pentamidine</b> | 1.55 ± 0.24 |

Average activities of at least 2 independent assays, N.A. No significant activity (less than 20%).

1. Copies of  $^1\text{H}$ ,  $^{13}\text{C}$  and  $^{31}\text{P}$  NMR of final products

## Compound 25

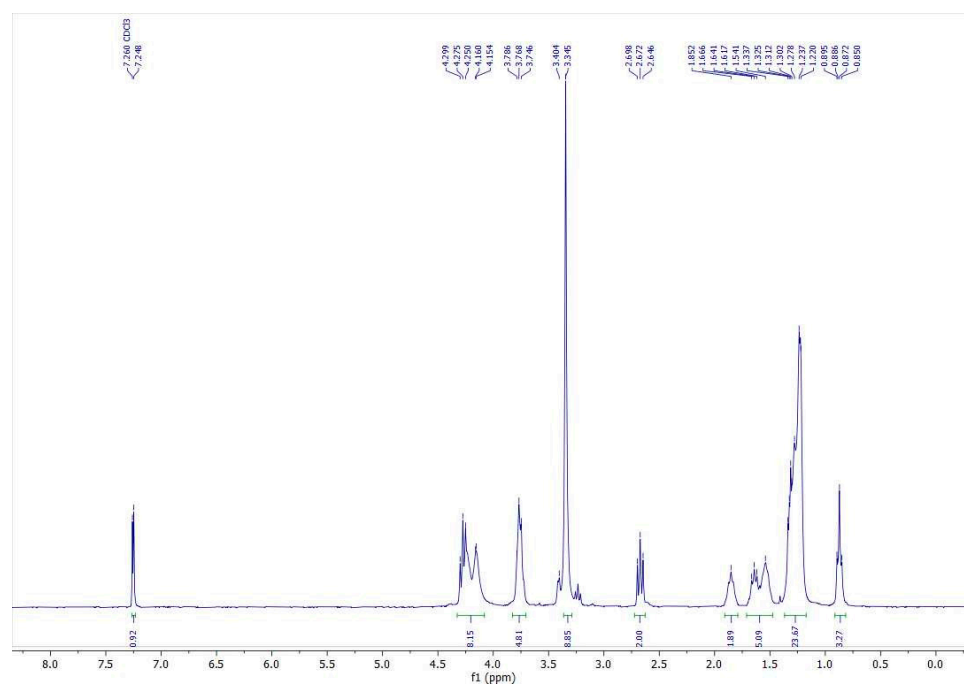Figure S1.  $^1\text{H}$ -NMR of compound 25 in  $\text{CDCl}_3$  at 600 MHz.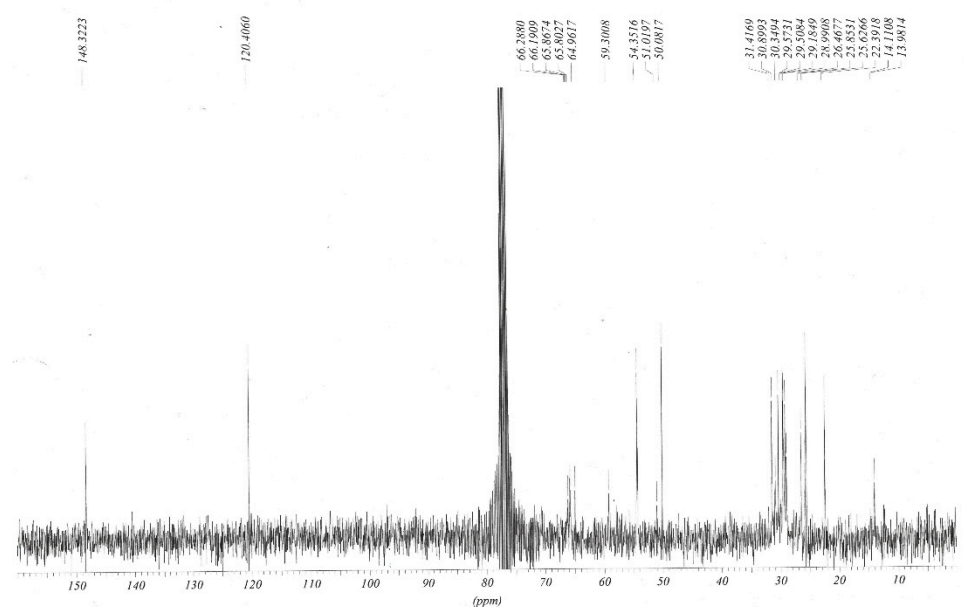Figure S2.  $^{13}\text{C}$ -NMR of compound 25 in  $\text{CDCl}_3$  at 150 MHz.

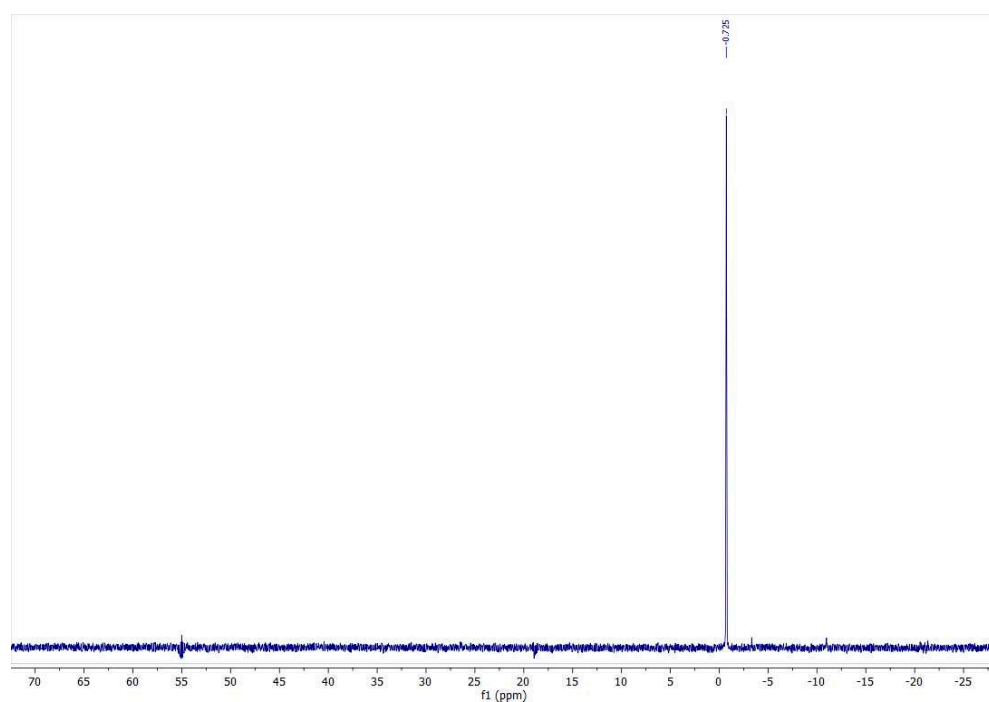

Figure S3.  $^{31}\text{P}$ -NMR of compound 25 in  $\text{CDCl}_3$  at 121.44 MHz.

#### Compound 26

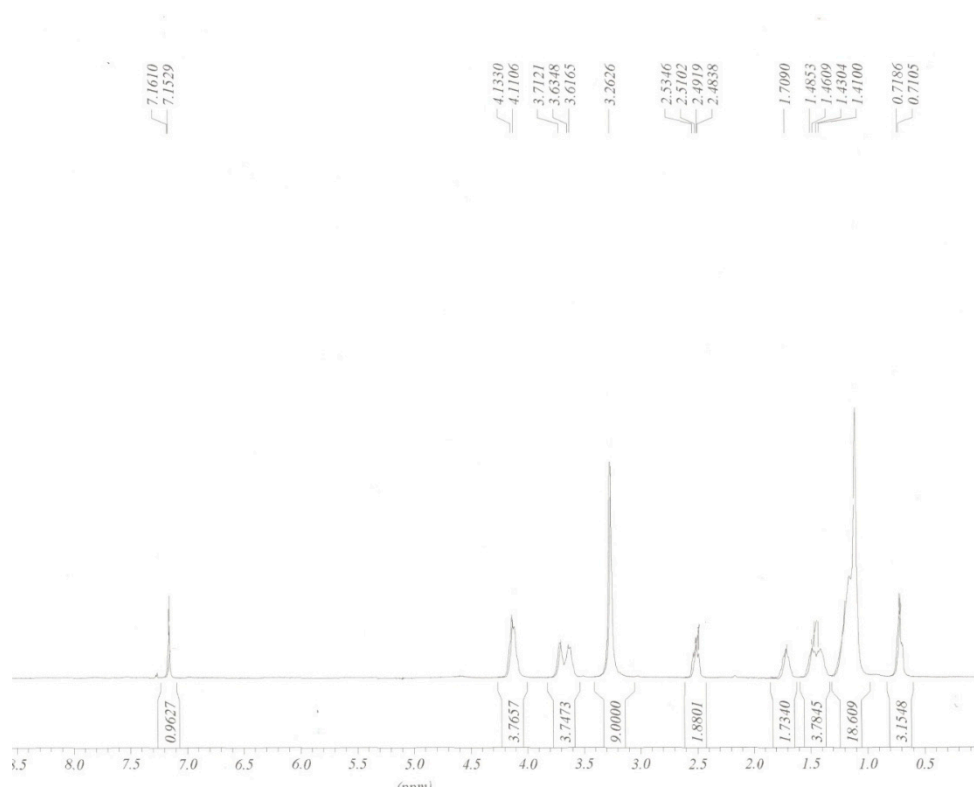

Figure S4.  $^1\text{H}$ -NMR of compound 26 in  $\text{CDCl}_3$  at 300 MHz.

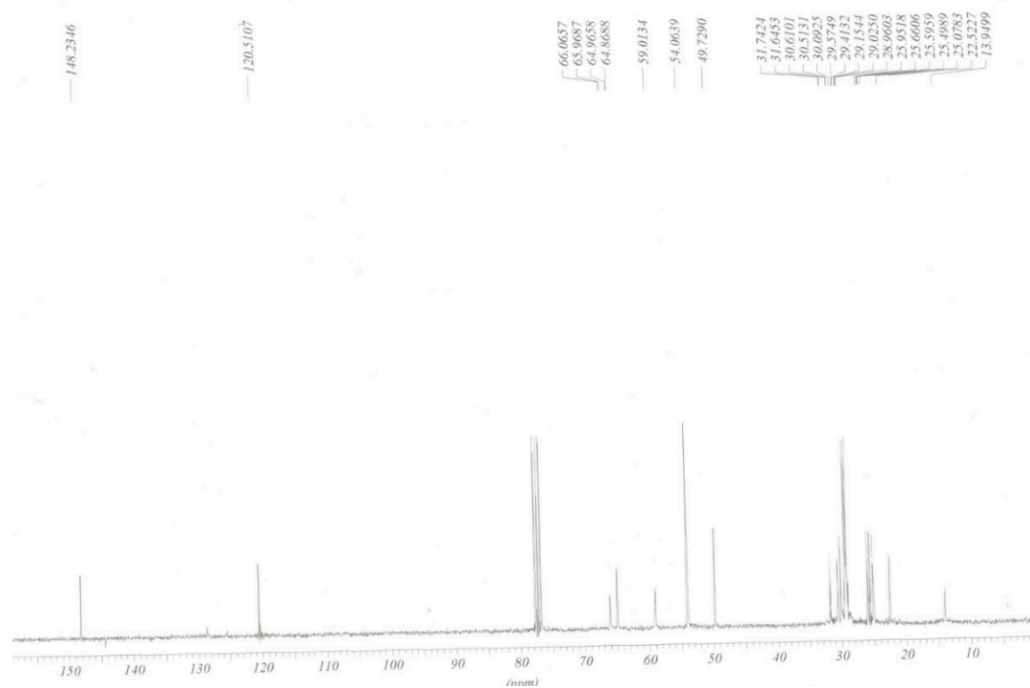

Figure S5. <sup>13</sup>C-NMR of compound 26 in CDCl<sub>3</sub> at 75 MHz.

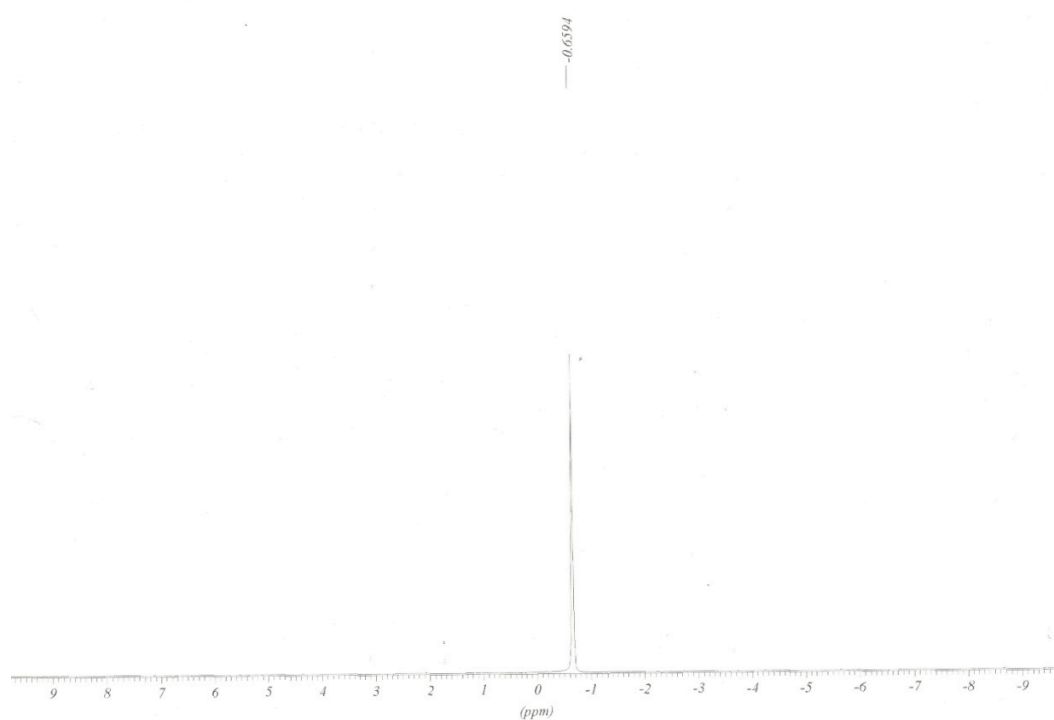

Figure S6. <sup>31</sup>P-NMR of compound 25 in CDCl<sub>3</sub> at 121.44 MHz.

## Compound 27

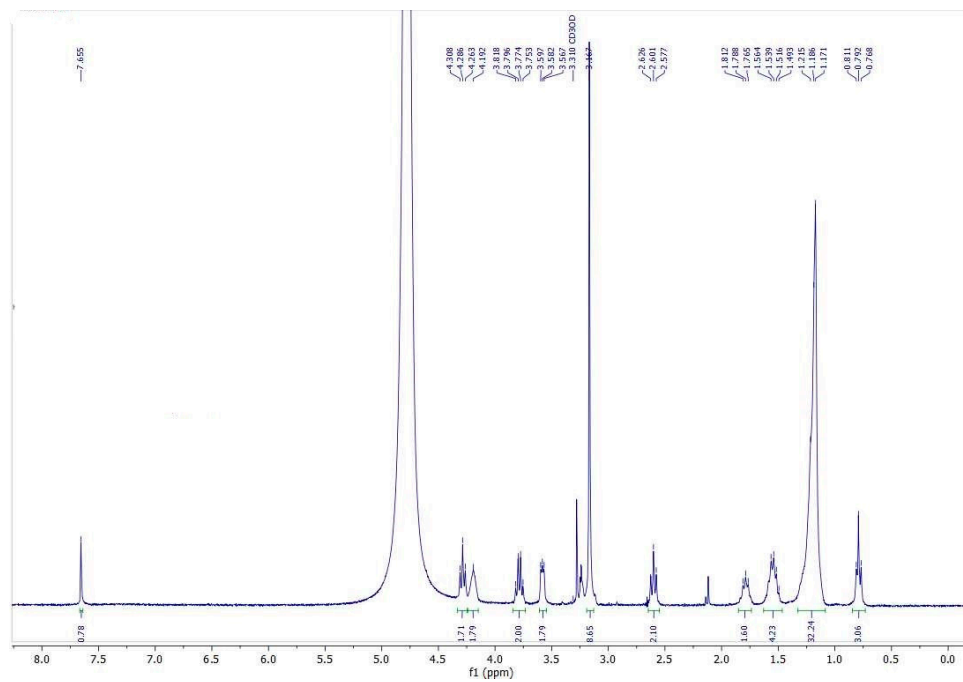Figure S7. <sup>1</sup>H-NMR of compound 27 in CD<sub>3</sub>OD at 600 MHz.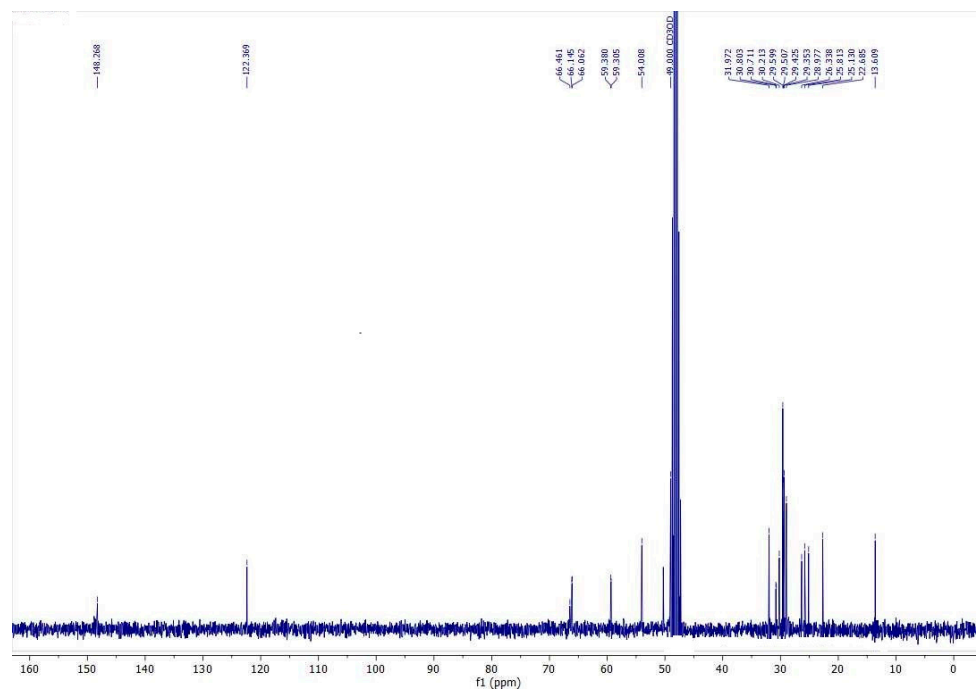Figure S8. <sup>13</sup>C-NMR of compound 27 in CD<sub>3</sub>OD at 150 MHz.



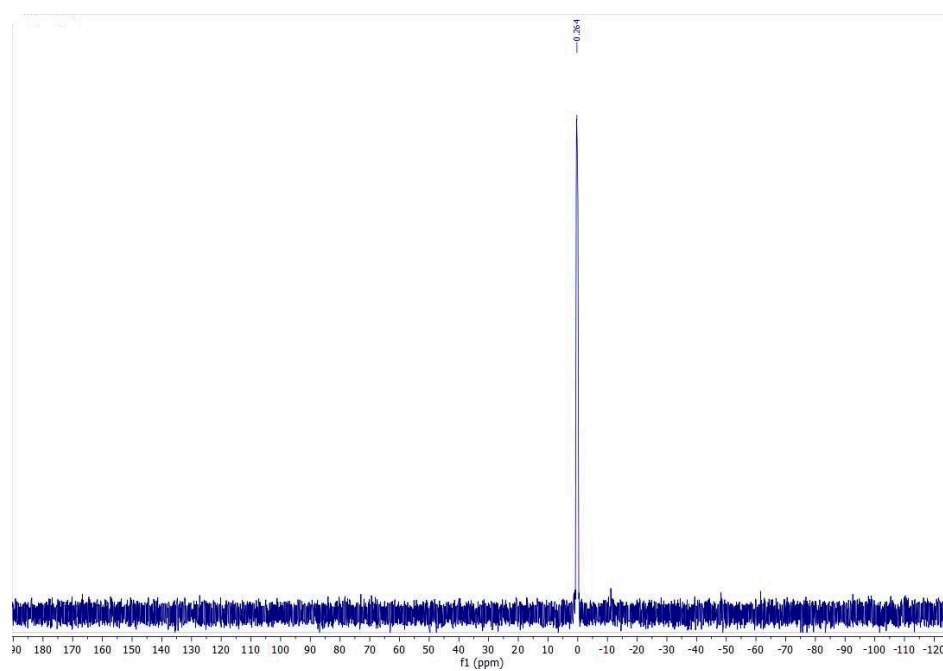

Figure S9.  $^{31}\text{P}$ -NMR of compound 27 in  $\text{CD}_3\text{OD}$  at 121.44 MHz.

### Compound 28

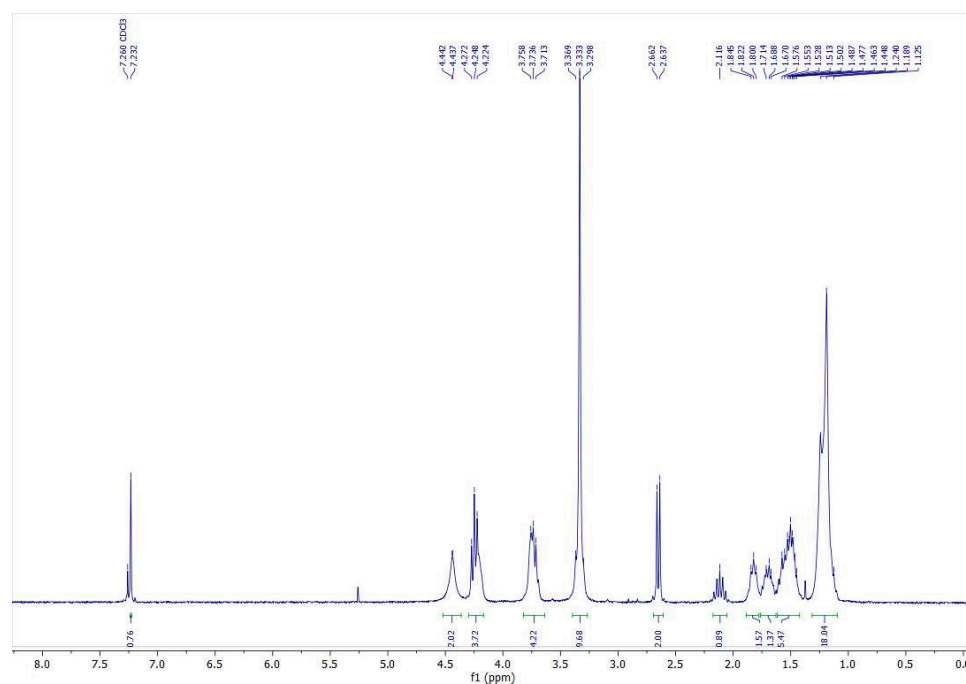

Figure S10.  $^1\text{H}$ -NMR of compound 28 in  $\text{CDCl}_3$  at 600 MHz.

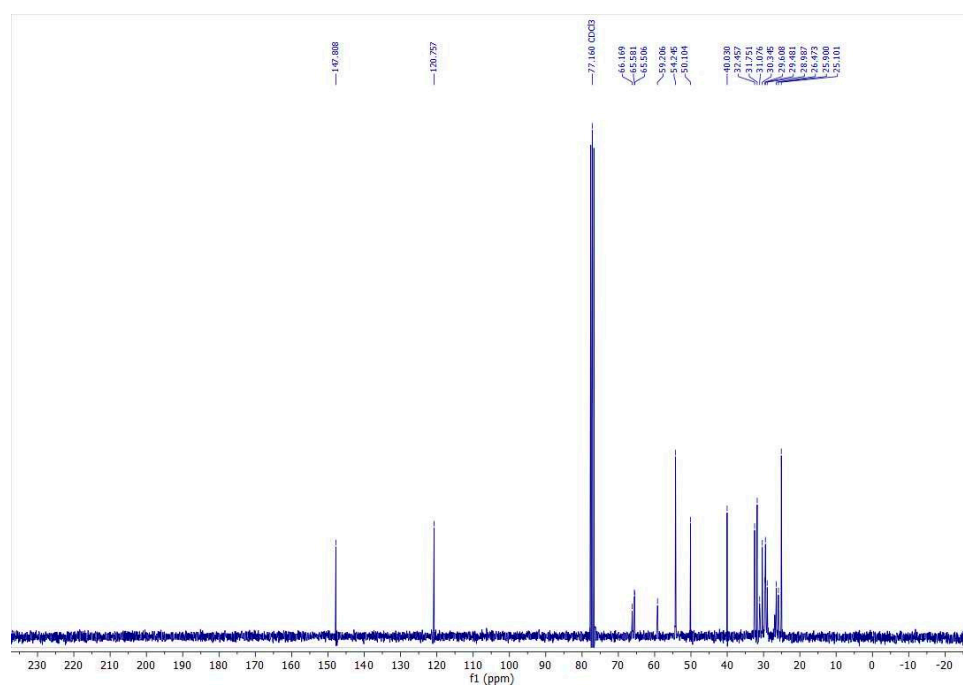

Figure S11. <sup>13</sup>C-NMR of compound **28** in CDCl<sub>3</sub> at 150 MHz.

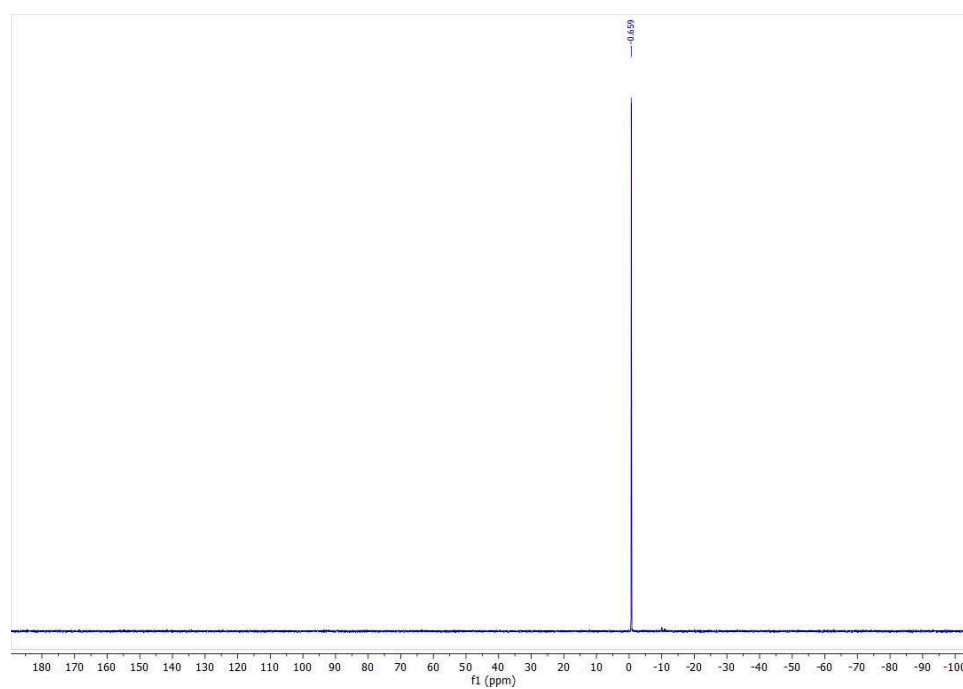

Figure S12. <sup>31</sup>P-NMR of compound **28** in CDCl<sub>3</sub> at 121.44 MHz.

## Compound 29

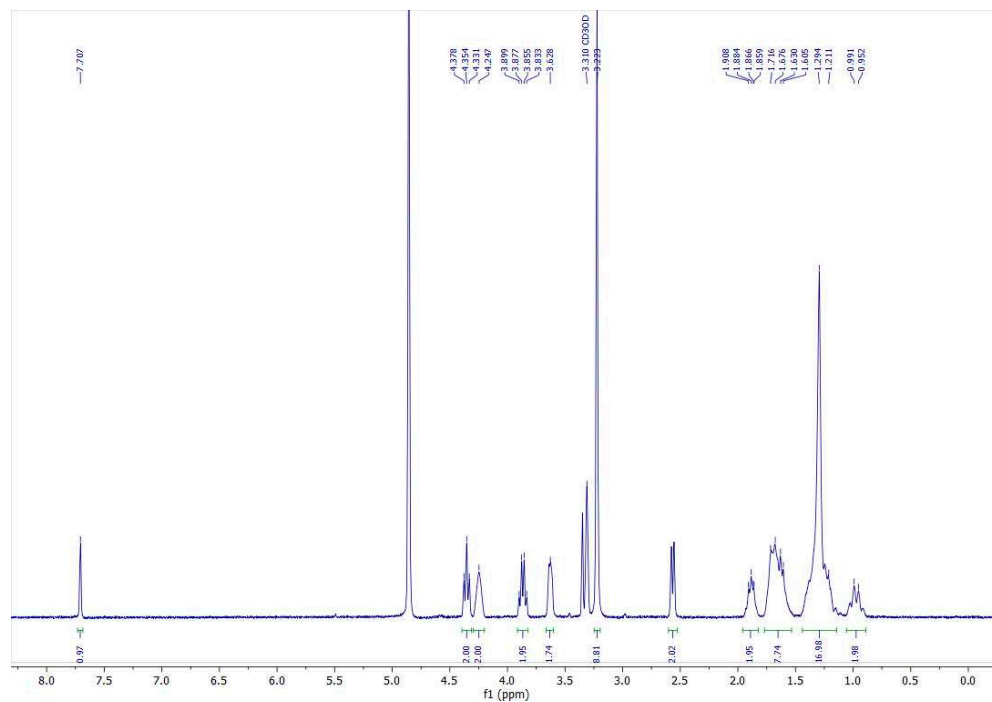Figure S13. <sup>1</sup>H-NMR of compound 29 in CD<sub>3</sub>OD at 600 MHz.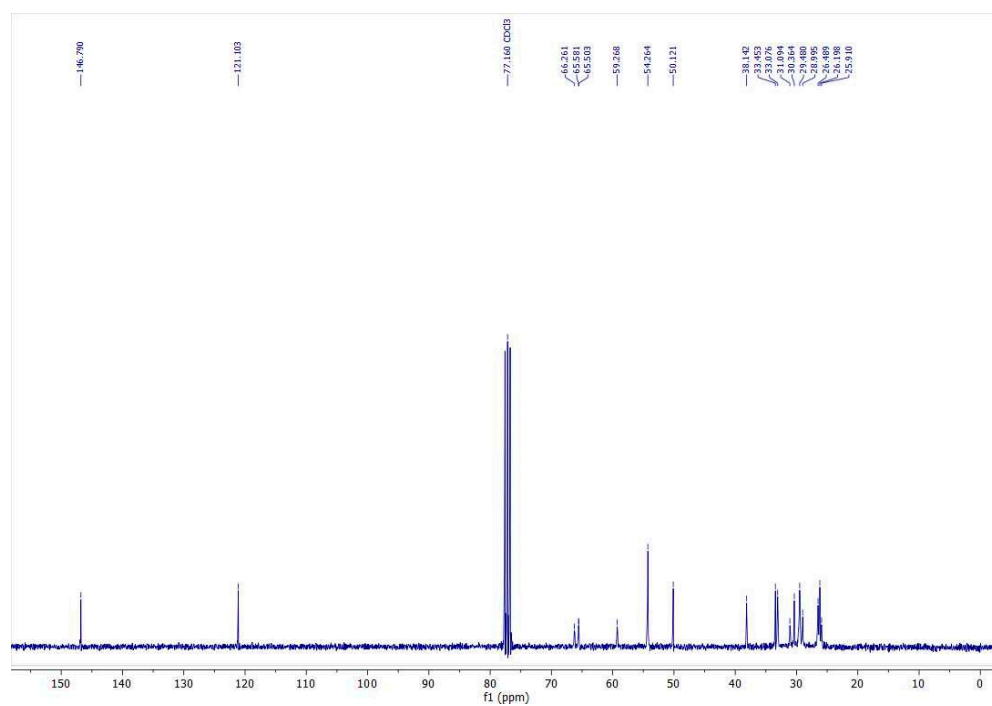Figure S14. <sup>13</sup>C-NMR of compound 29 in CD<sub>3</sub>OD at 150 MHz.

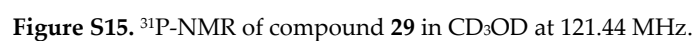

<sup>1</sup>H NMR spectrum of compound 10 in CDCl<sub>3</sub>. The x-axis represents the chemical shift in ppm, ranging from 0.0 to 8.0. The spectrum shows several peaks, with integration values indicated below the baseline. A list of chemical shifts (δ) is provided on the right side of the spectrum.

Chemical shifts (δ) listed on the right:

- 7.709
- 7.355
- 7.352
- 7.347
- 7.346
- 7.224
- 5.104
- 4.385
- 4.441
- 4.437
- 4.432
- 4.416
- 4.432
- 4.424
- 4.355
- 4.229
- 3.876
- 3.854
- 3.832
- 3.814
- 3.637
- 3.629
- 3.613
- 3.310
- 3.223
- 2.686
- 2.671
- 2.646
- 2.275
- 2.253
- 2.226
- 1.897
- 1.891
- 1.875
- 1.849
- 1.821
- 1.804
- 1.688
- 1.601
- 1.585
- 1.377
- 1.362
- 1.337
- 1.311
- 1.286

Integration values listed below the baseline:

- 0.95
- 3.96
- 1.90
- 2.00
- 2.02
- 2.05
- 2.04
- 9.42
- 1.97
- 2.05
- 1.99
- 5.70
- 24.10

**Figure S16.**  $^1\text{H}$ -NMR of compound **30** in  $\text{CD}_3\text{OD}$  at 600 MHz.

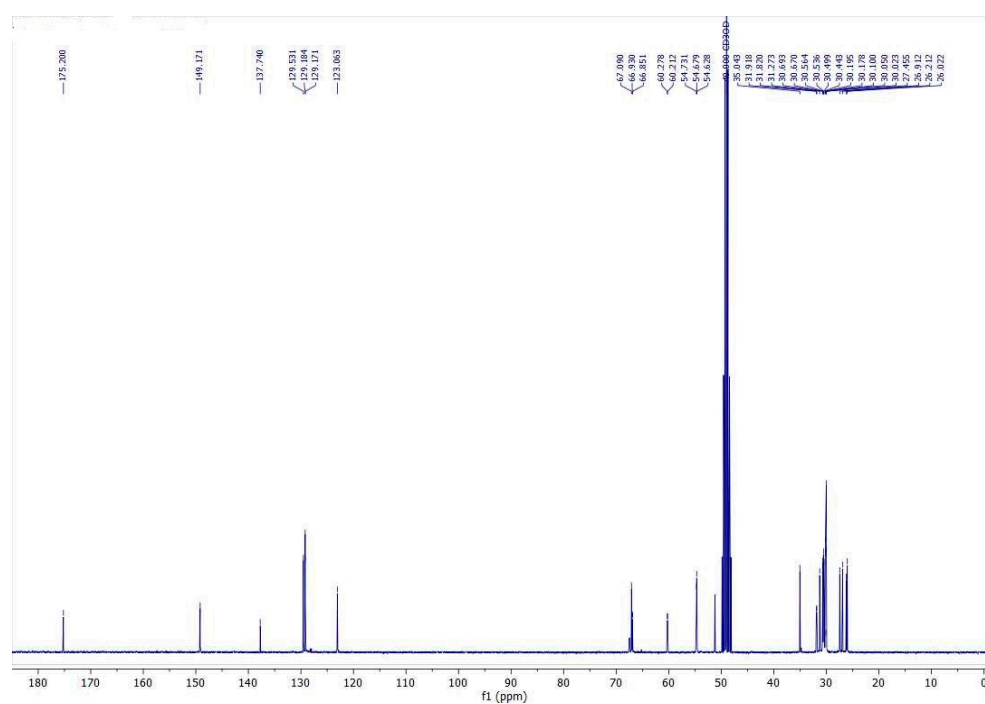

**Figure S17.**  $^{13}\text{C}$ -NMR of compound **30** in  $\text{CD}_3\text{OD}$  at 150 MHz.

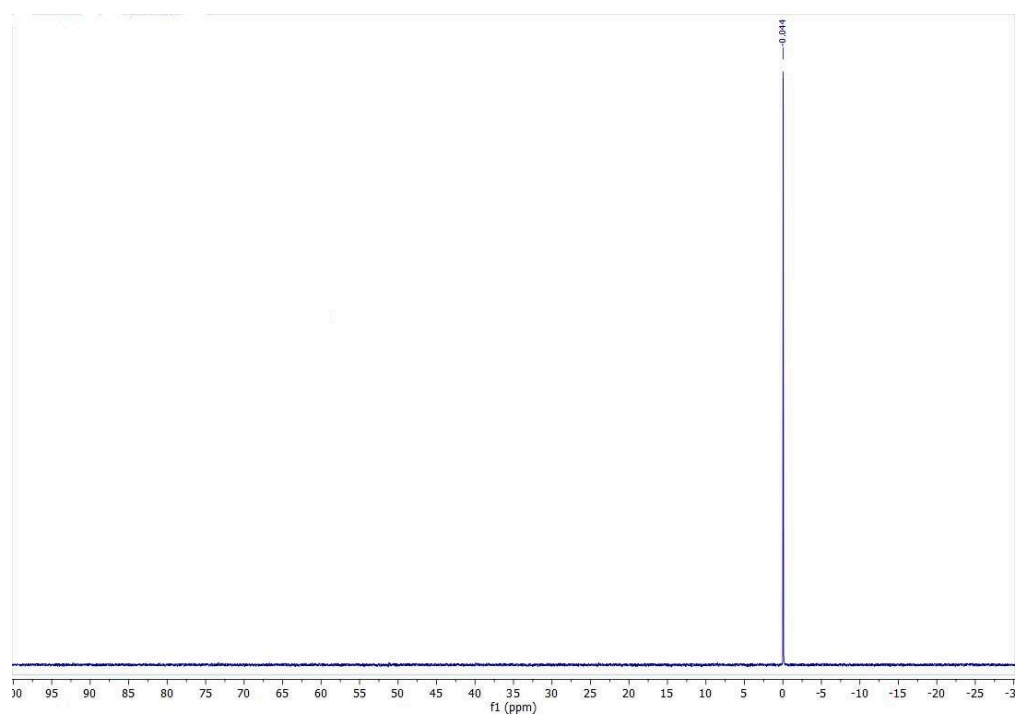

**Figure S18.**  $^{31}\text{P}$ -NMR of compound **30** in  $\text{CD}_3\text{OD}$  at 121.44 MHz.

## Compound 31

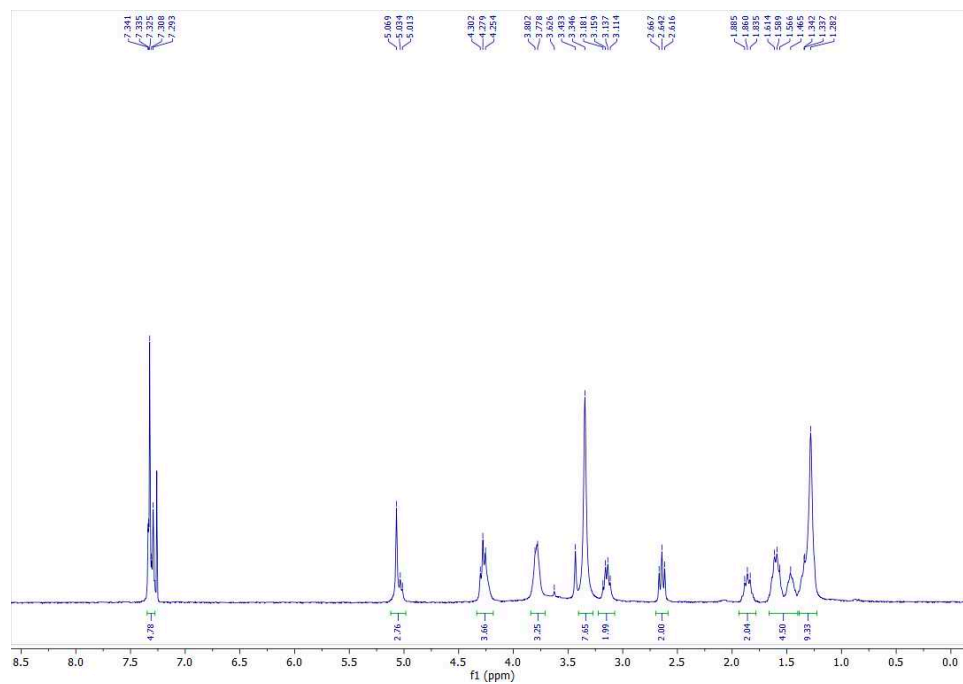Figure S19. <sup>1</sup>H-NMR of compound 31 in CDCl<sub>3</sub> at 600 MHz.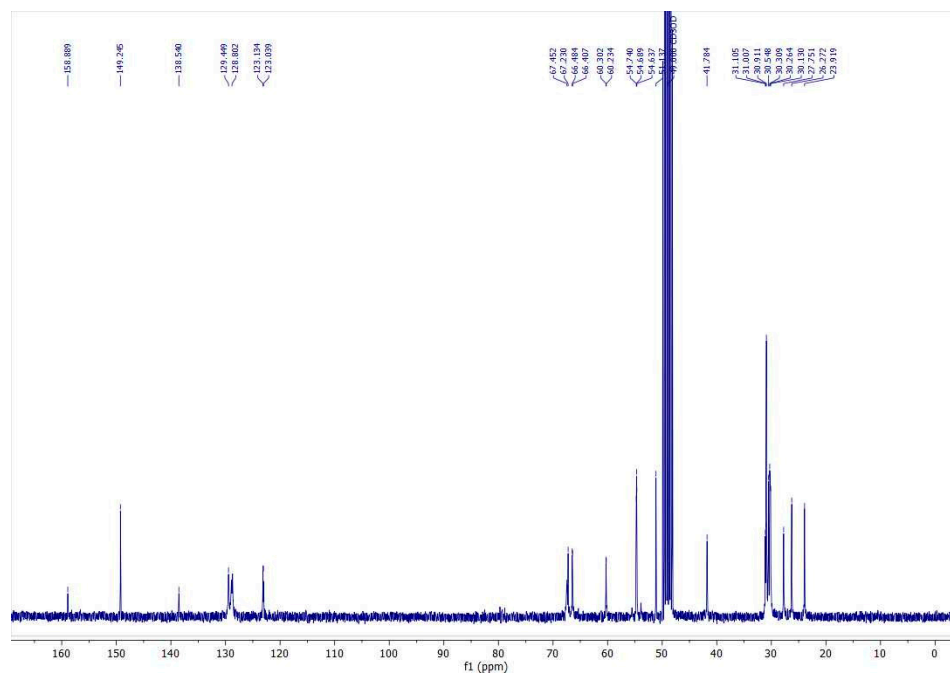

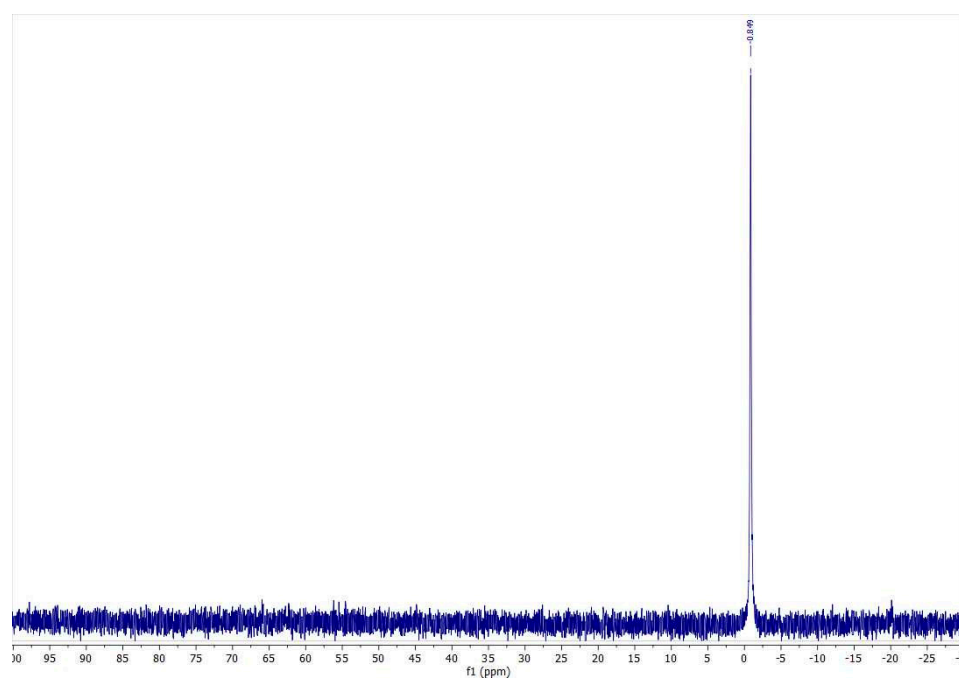

Figure S21.  $^{31}\text{P}$ -NMR of compound 31 in  $\text{CD}_3\text{OD}$  at 121.44 MHz.

### Compound 32

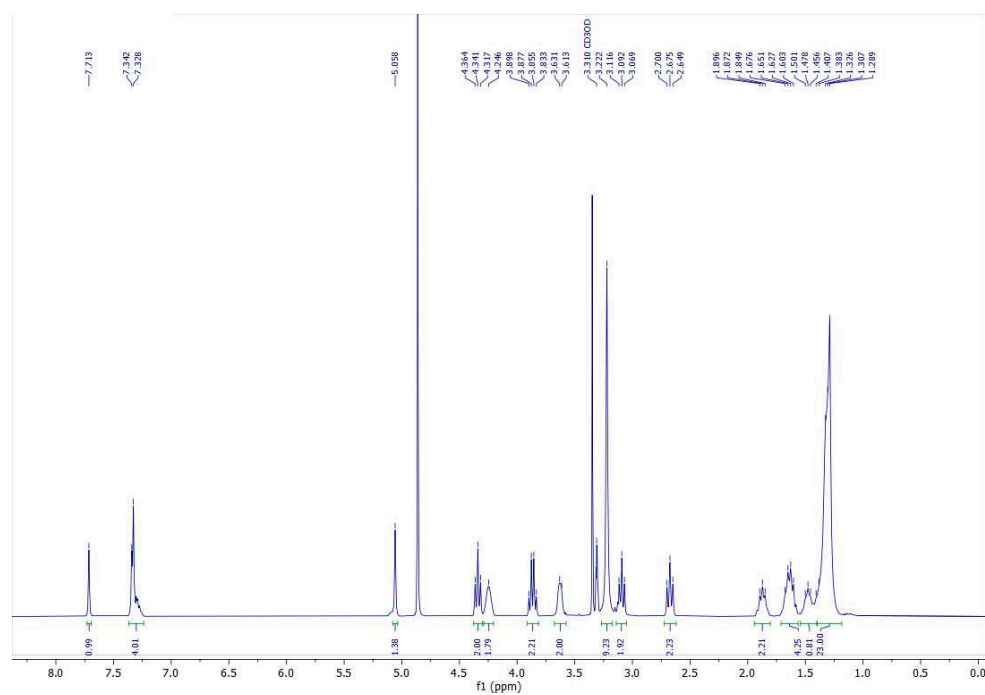

Figure S22.  $^1\text{H}$ -NMR of compound 32 in  $\text{CD}_3\text{OD}$  at 600 MHz.

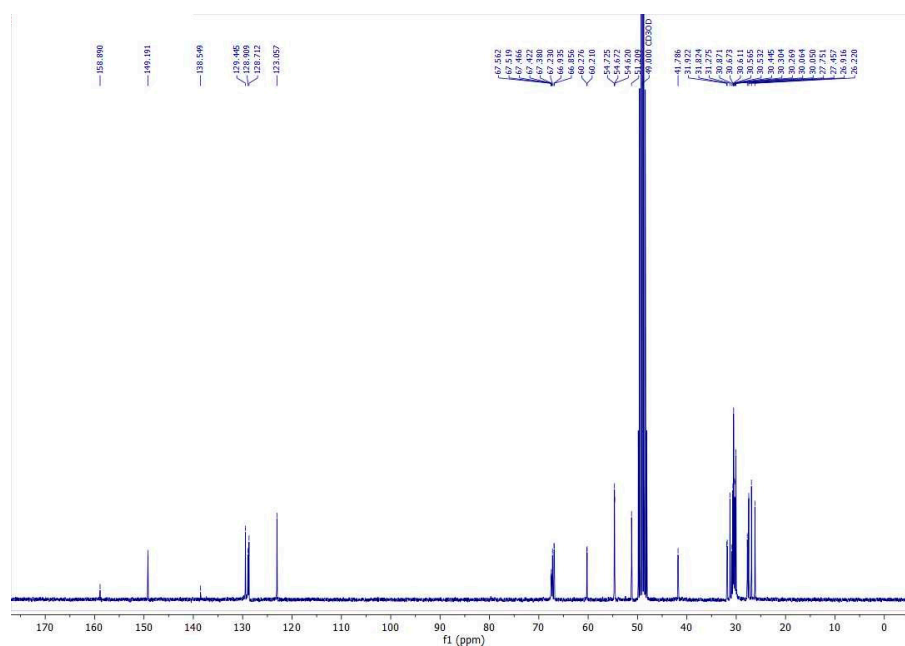

Figure S23.  $^{13}\text{C}$ -NMR of compound **32** in  $\text{CD}_3\text{OD}$  at 150 MHz.

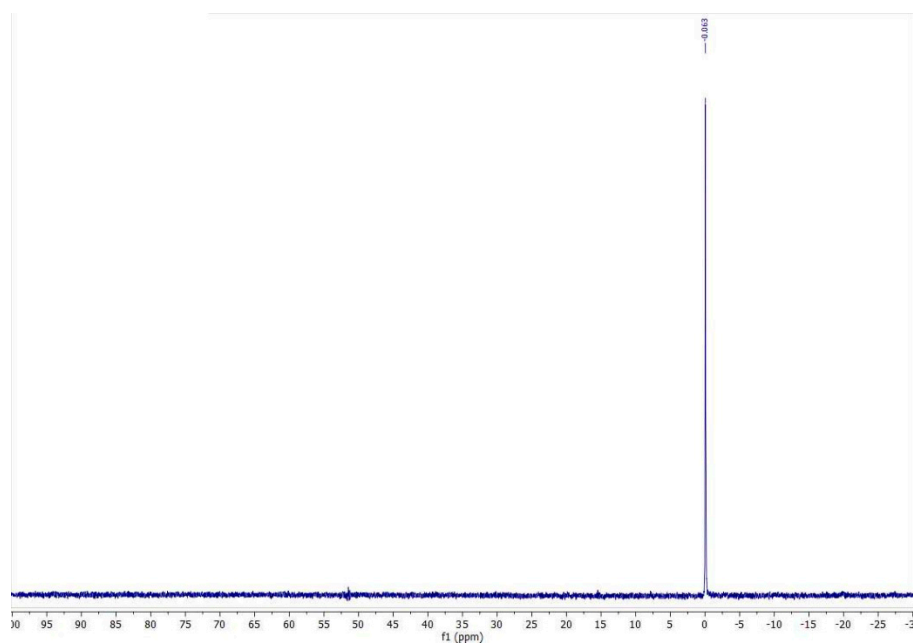

Figure S24.  $^{31}\text{P}$ -NMR of compound **32** in  $\text{CD}_3\text{OD}$  at 121.44 MHz.



## Compound 33

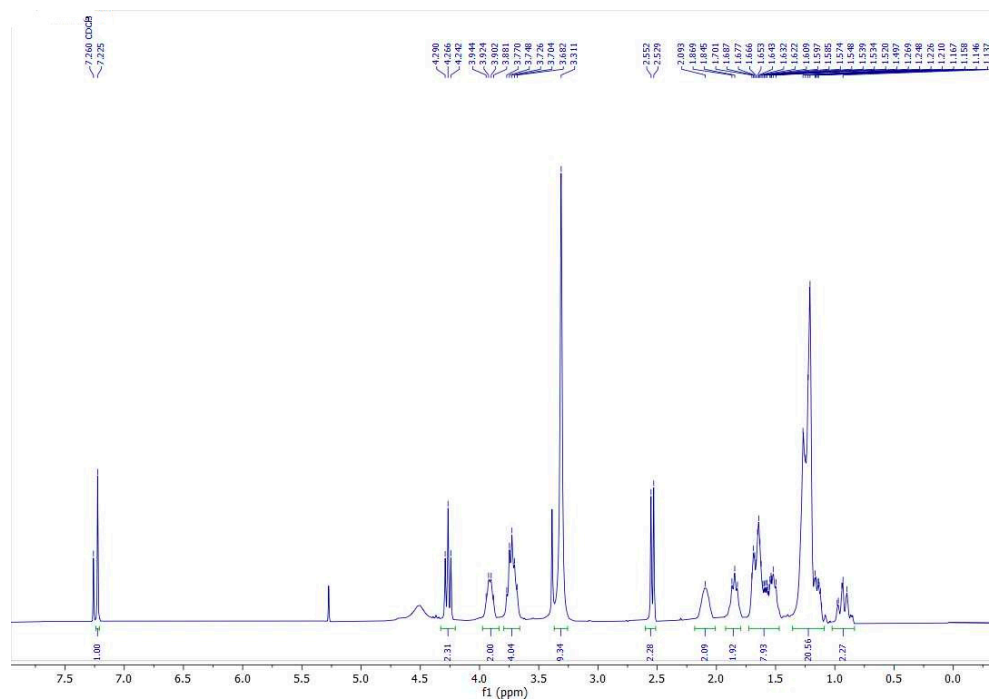Figure S25. <sup>1</sup>H-NMR of compound 33 in CDCl<sub>3</sub> at 600 MHz.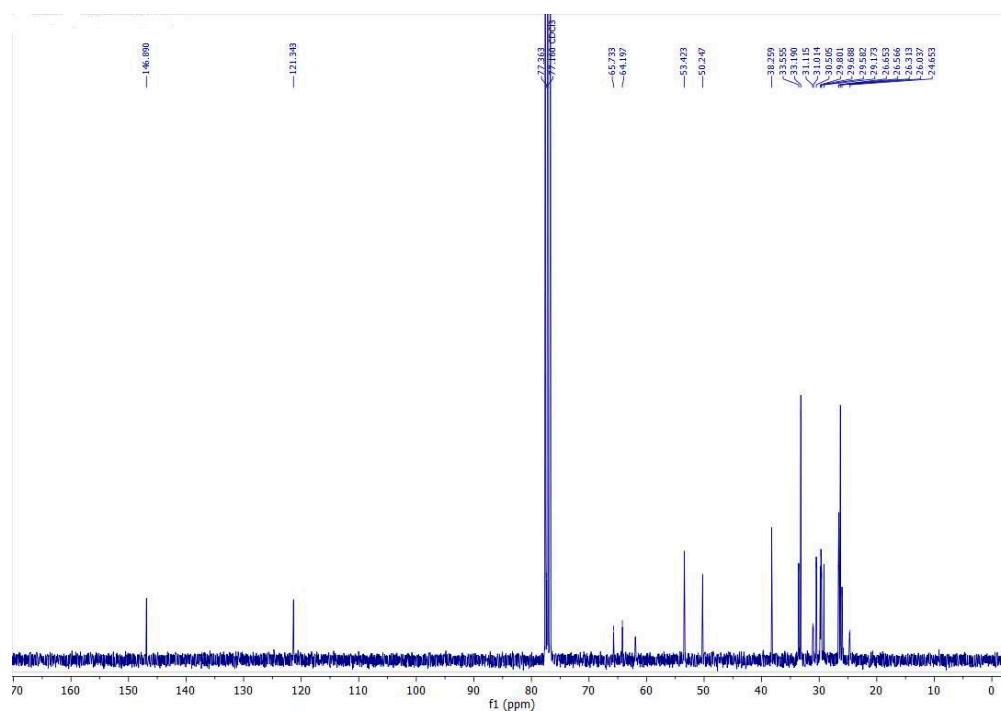Figure S26. <sup>13</sup>C-NMR of compound 33 in CDCl<sub>3</sub> at 150 MHz.

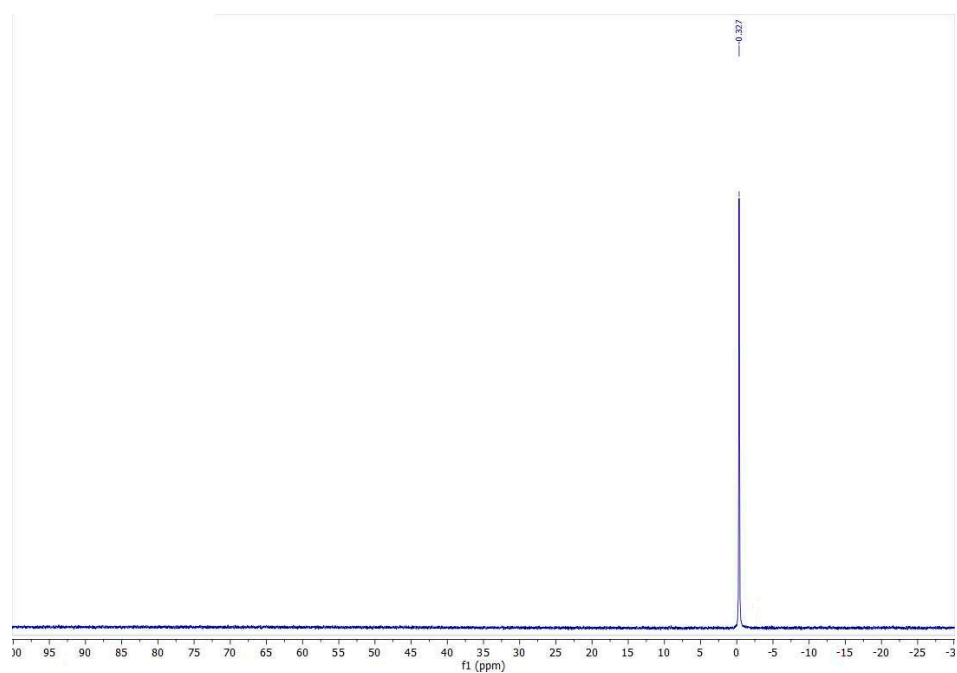

Figure S27.  $^{31}\text{P}$ -NMR of compound **33** in  $\text{CDCl}_3$  at 121.44 MHz.

### Compound **34**

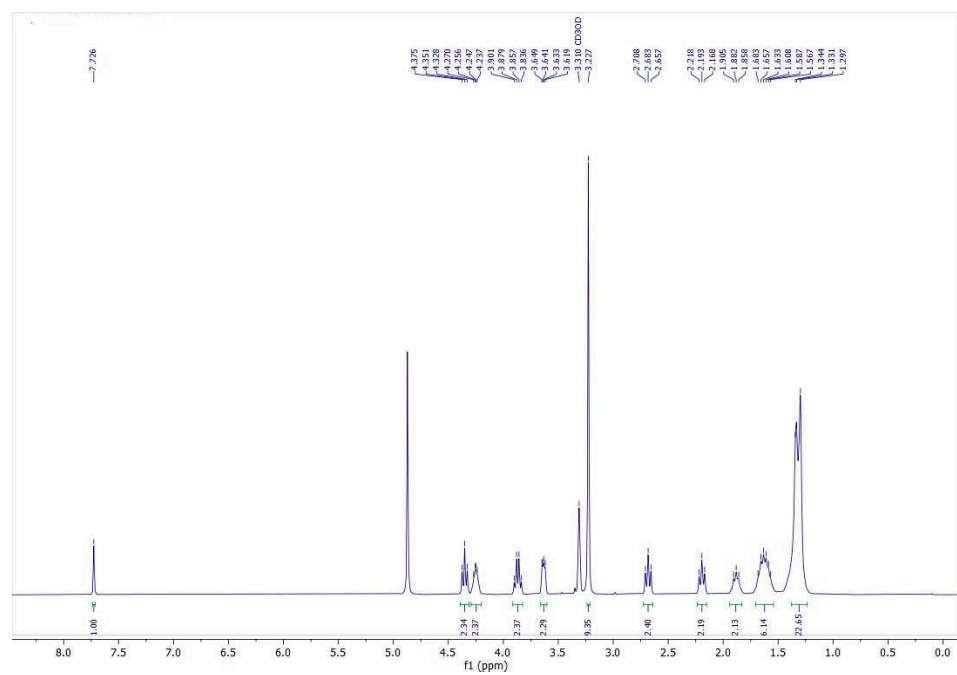

Figure S28.  $^1\text{H}$ -NMR of compound **34** in  $\text{CD}_3\text{OD}$  at 600 MHz.

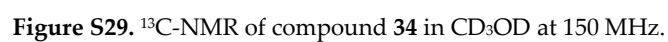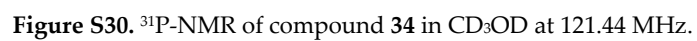

## Compound 35

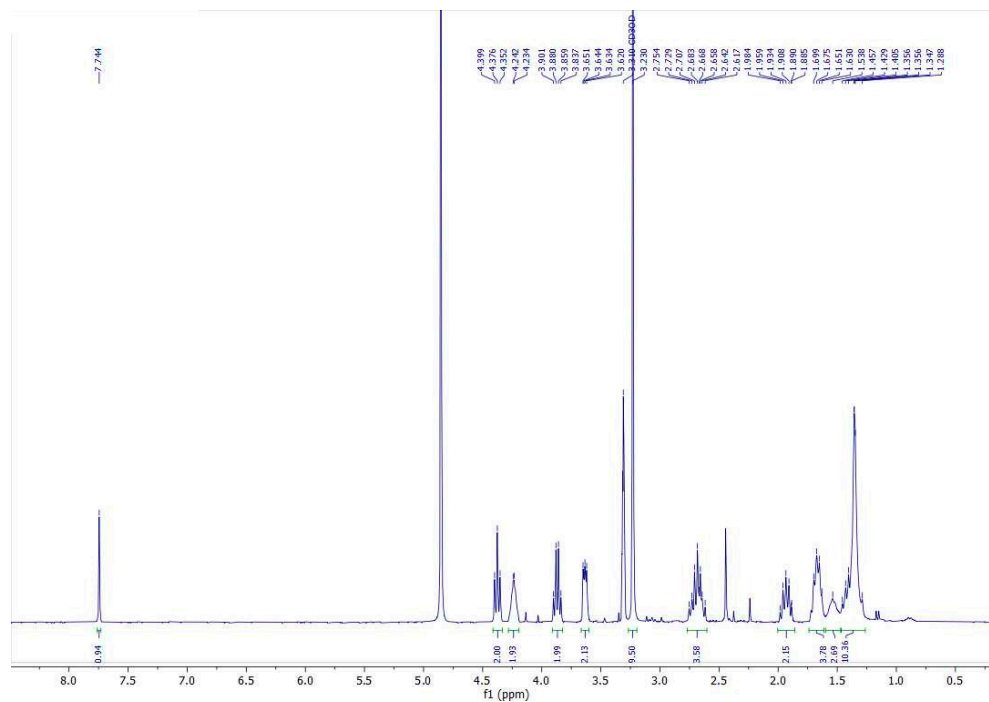Figure S31. <sup>1</sup>H-NMR of compound 35 in CD<sub>3</sub>OD at 600 MHz.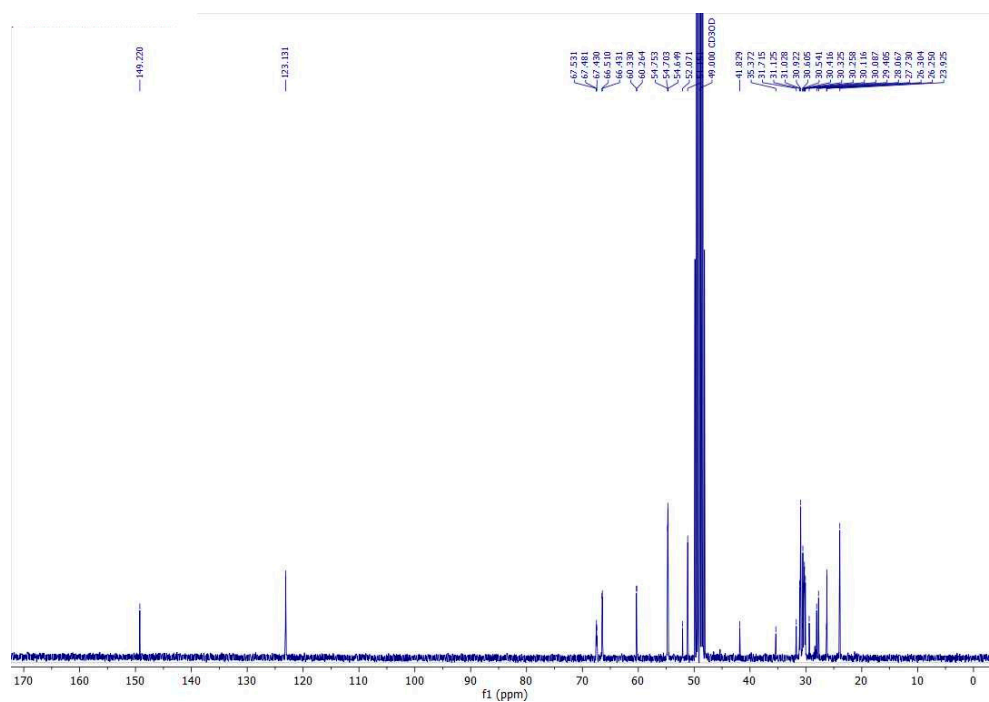Figure S32. <sup>13</sup>C-NMR of compound 35 in CD<sub>3</sub>OD at 150 MHz.

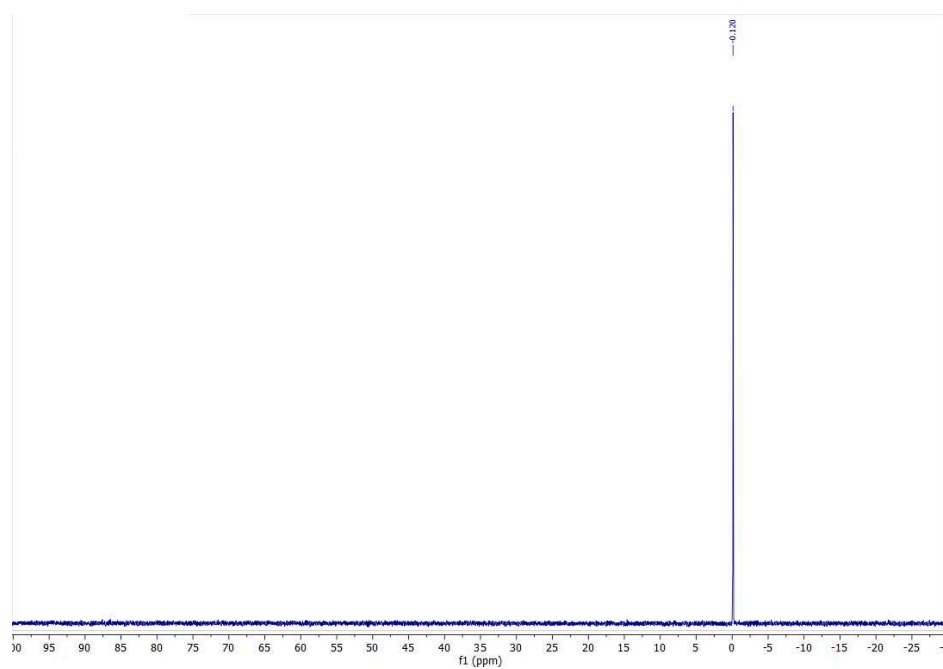

Figure S33.  $^{31}\text{P}$ -NMR of compound 35 in  $\text{CD}_3\text{OD}$  at 121.44 MHz.

### Compound 36

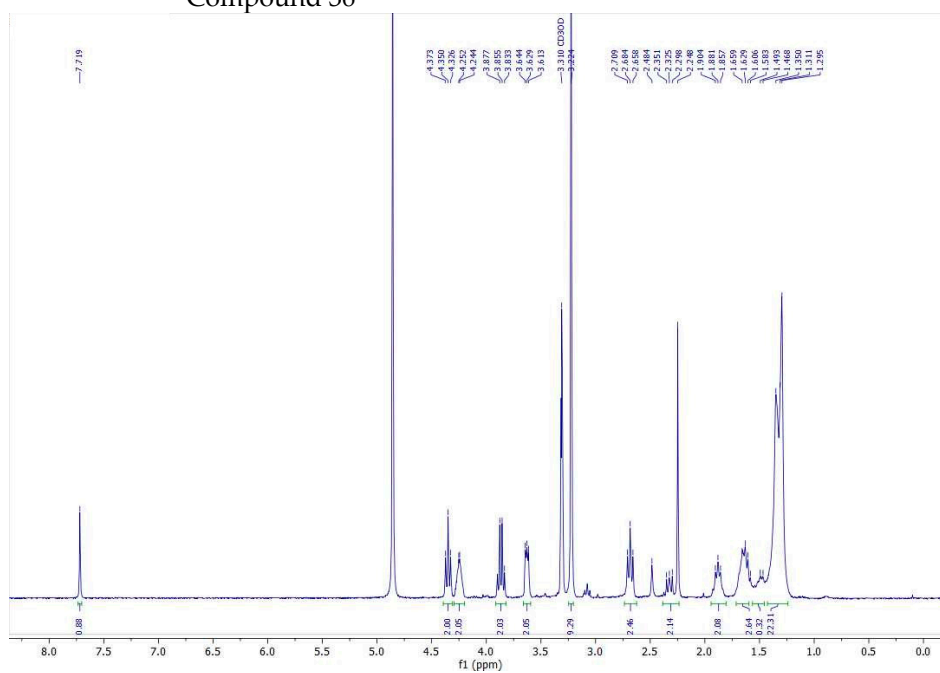

Figure S34.  $^1\text{H}$ -NMR of compound 36 in  $\text{CD}_3\text{OD}$  at 600 MHz.

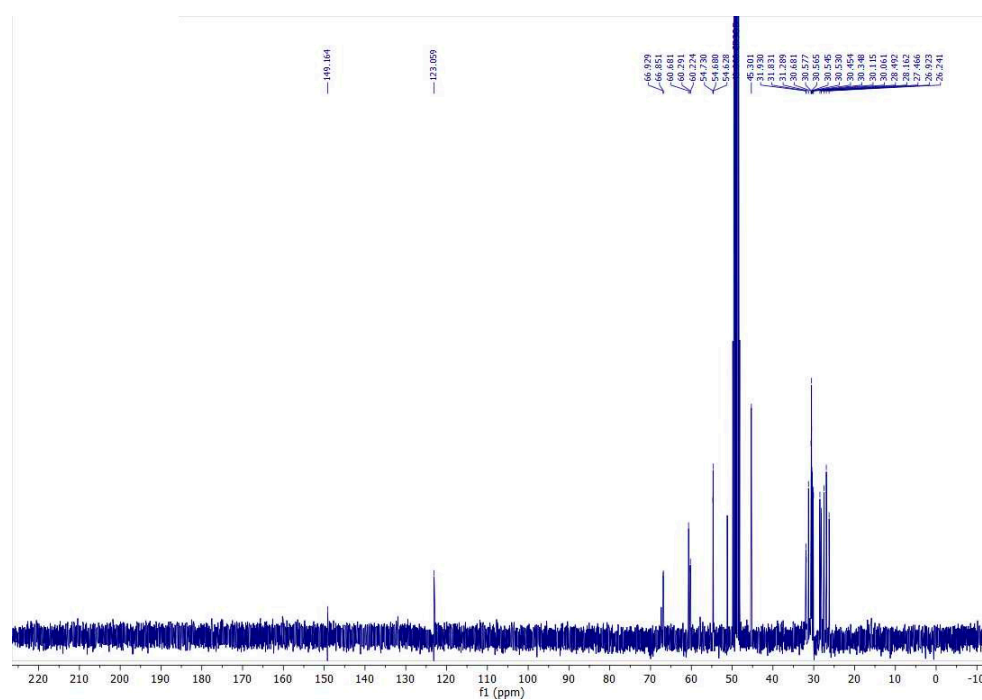

Figure S35. <sup>13</sup>C-NMR of compound 36 in CD<sub>3</sub>OD at 150 MHz.

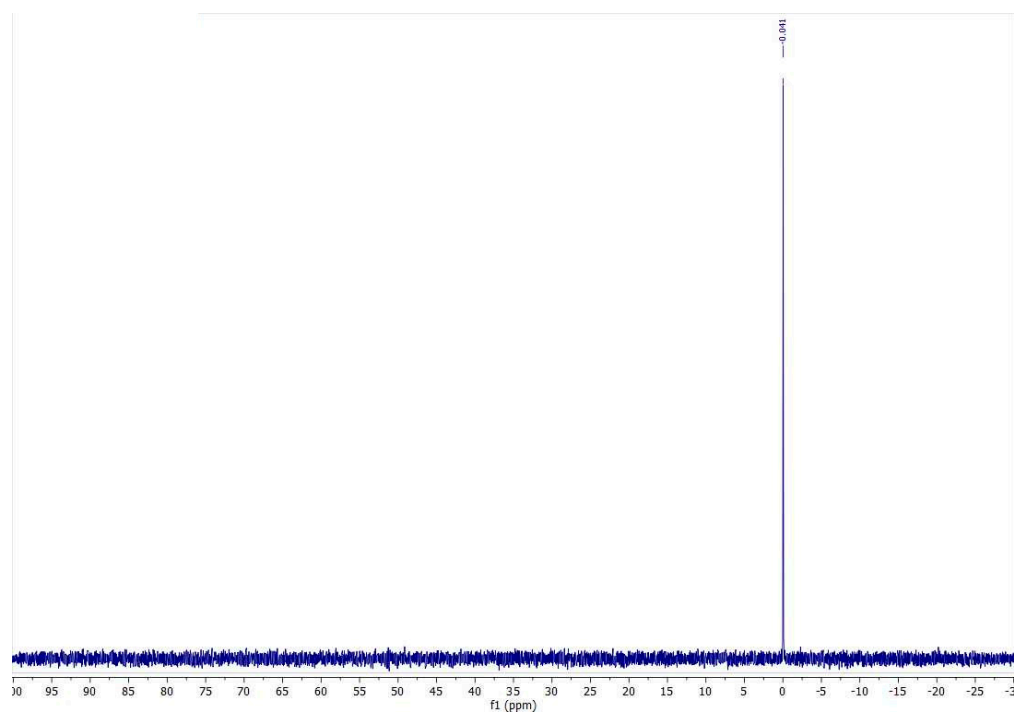

Figure S36. <sup>31</sup>P-NMR of compound 36 in CD<sub>3</sub>OD at 121.44 MHz.

## Compound 41

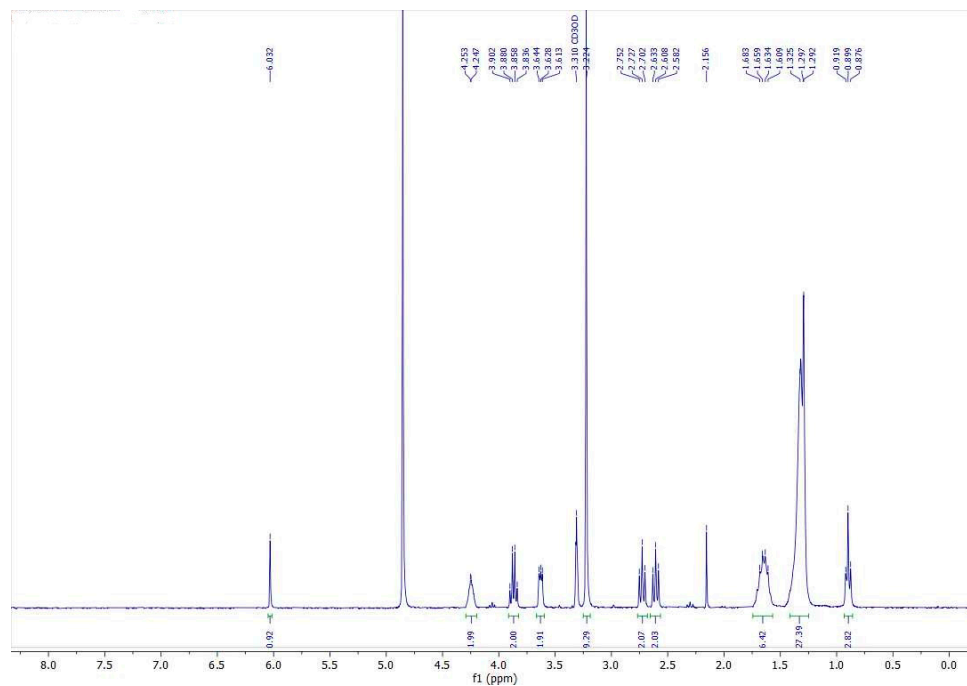Figure S37. <sup>1</sup>H-NMR of compound 41 in CD<sub>3</sub>OD at 600 MHz.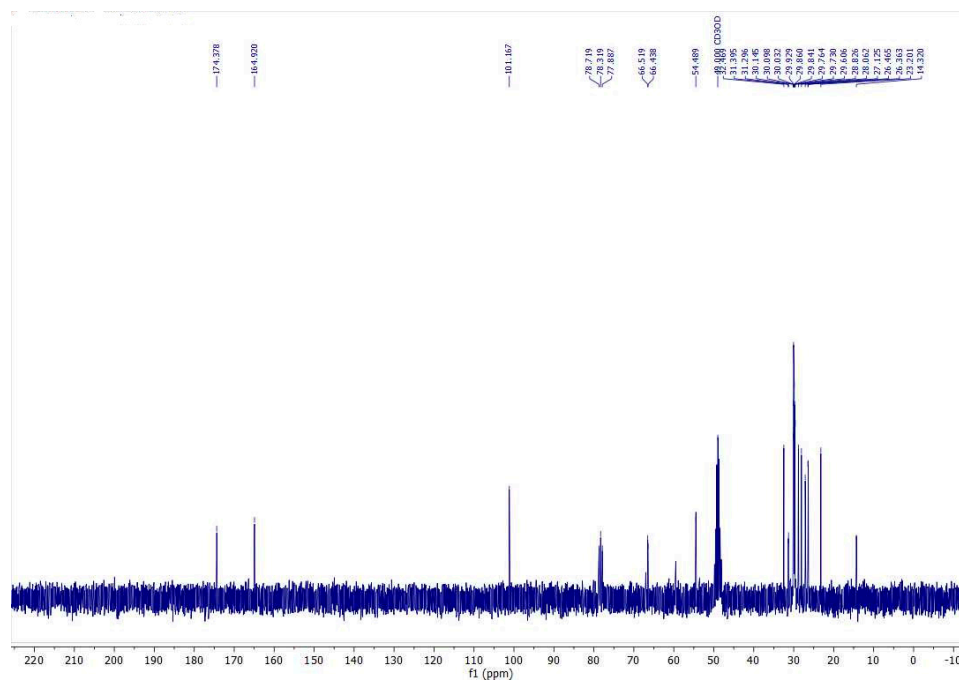Figure S38. <sup>13</sup>C-NMR of compound 41 in CD<sub>3</sub>OD at 150 MHz.

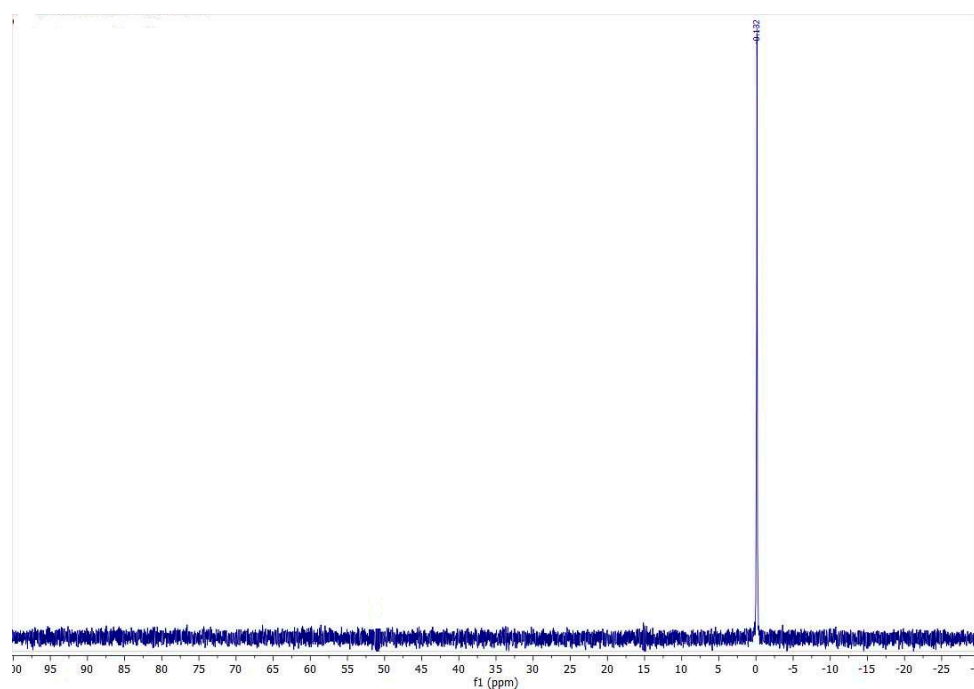

Figure S39.  $^{31}\text{P}$ -NMR of compound 41 in  $\text{CD}_3\text{OD}$  at 121.44 MHz.

### Compound 53

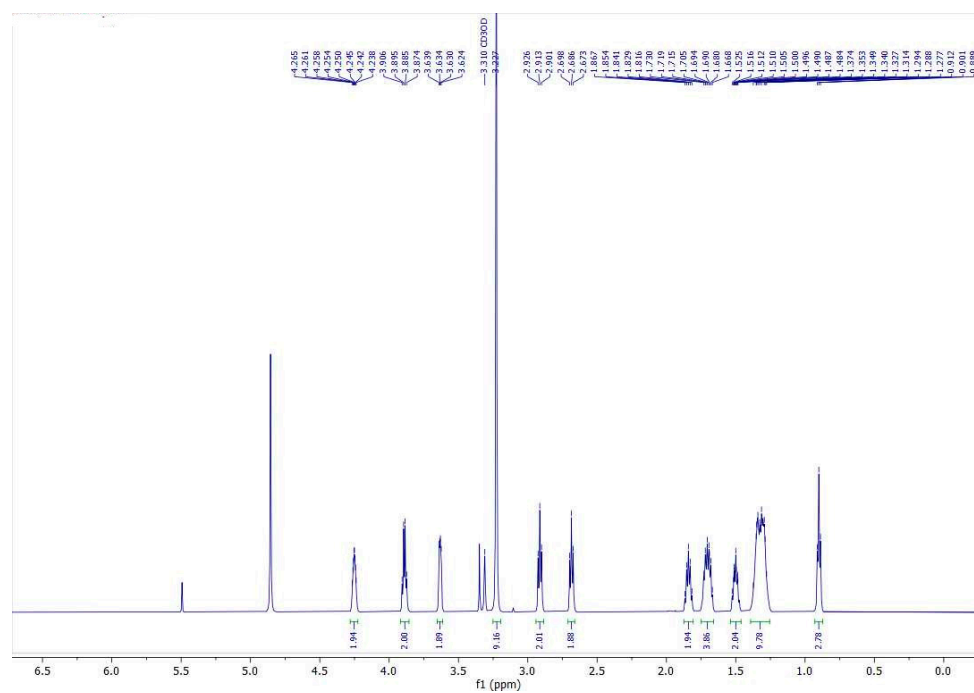

Figure S40.  $^1\text{H}$ -NMR of compound 53 in  $\text{CD}_3\text{OD}$  at 600 MHz.



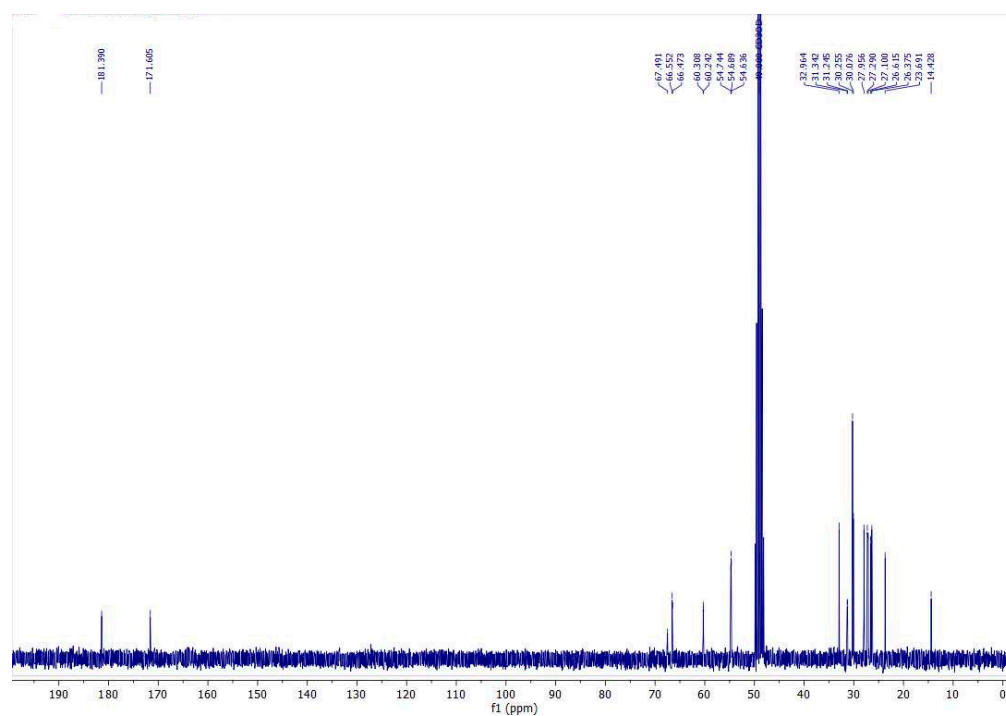

Figure S41. <sup>13</sup>C-NMR of compound 53 in CD<sub>3</sub>OD at 150 MHz.

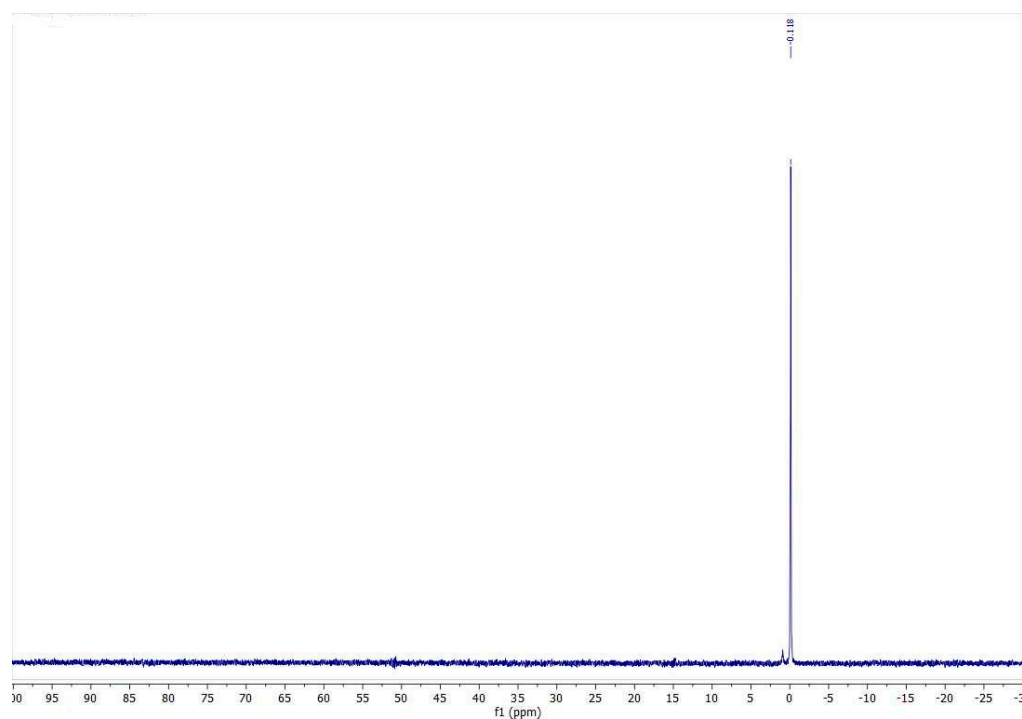

Figure S42. <sup>31</sup>P-NMR of compound 53 in CD<sub>3</sub>OD at 121.44 MHz.

## Compound 54

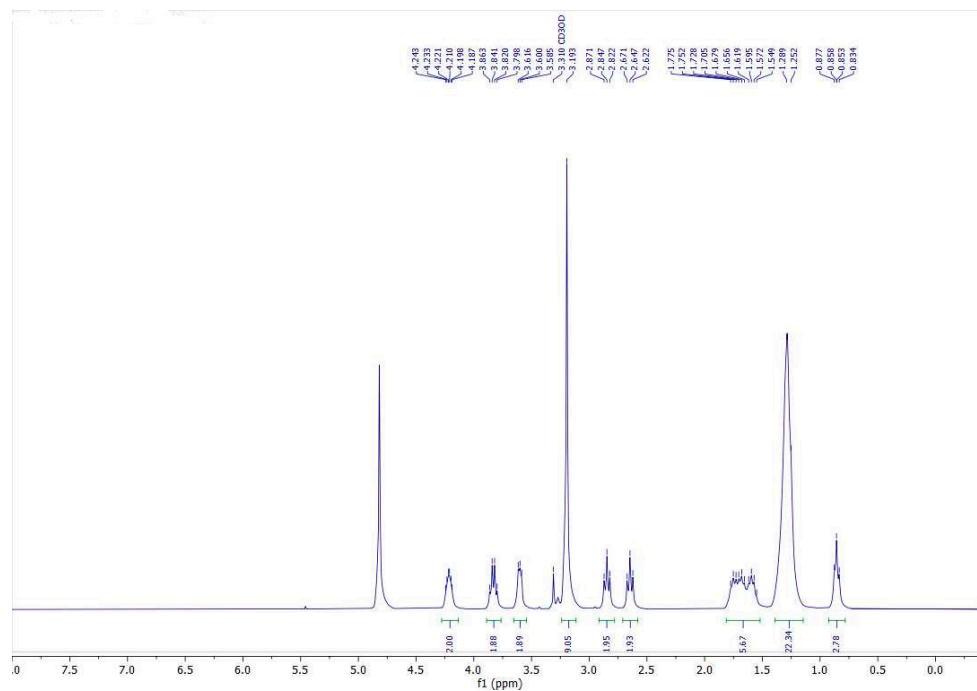Figure S43. <sup>1</sup>H-NMR of compound 54 in CD<sub>3</sub>OD at 600 MHz.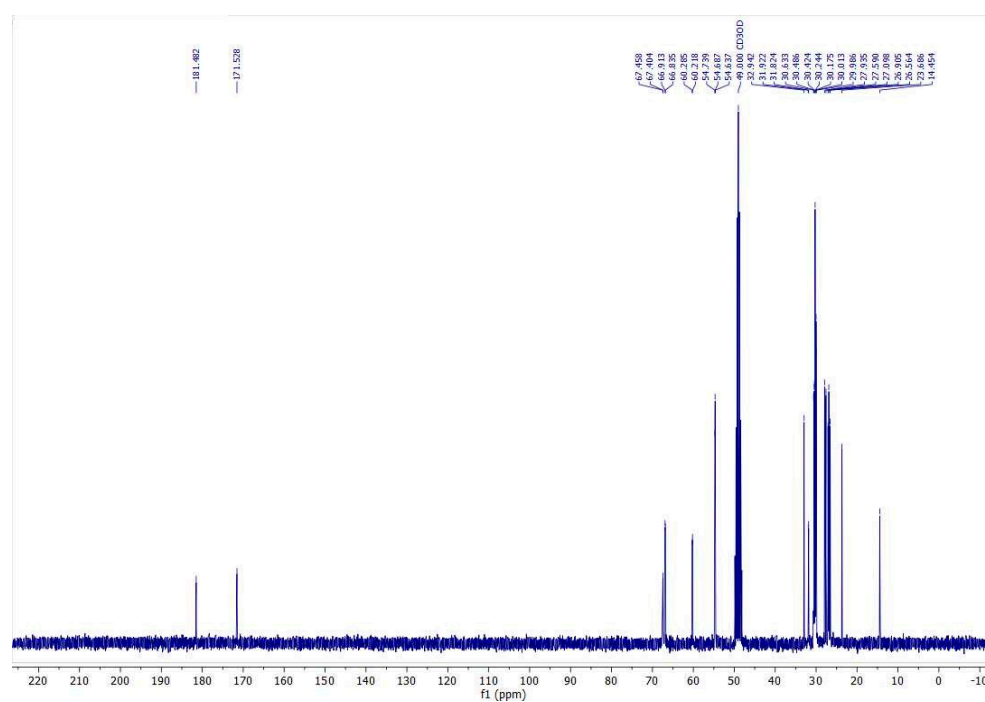Figure S44. <sup>13</sup>C-NMR of compound 54 in CD<sub>3</sub>OD at 150 MHz.

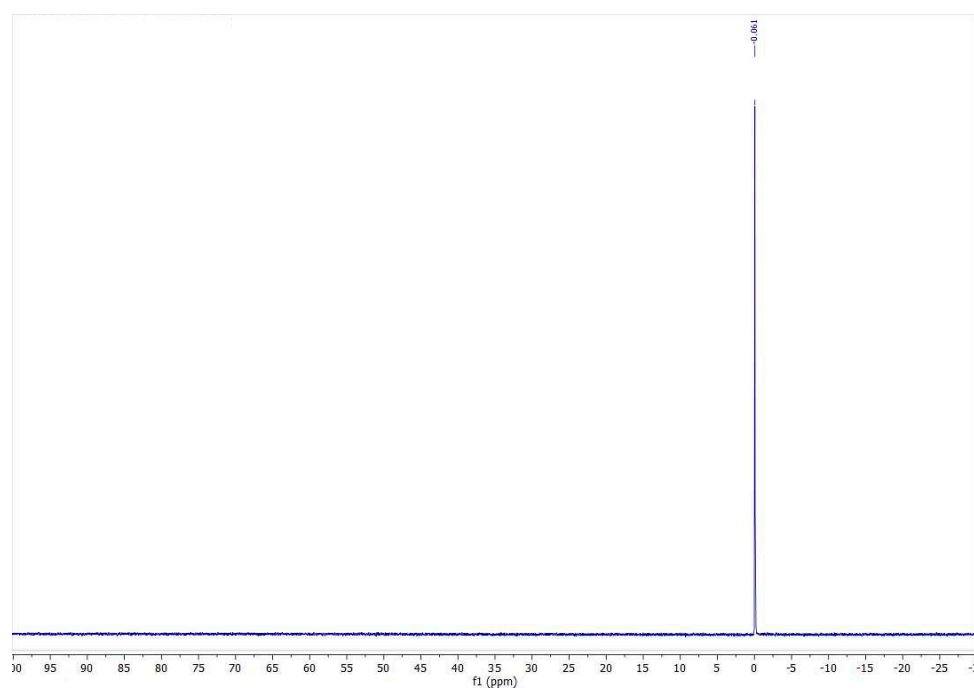

Figure S45.  $^{31}\text{P}$ -NMR of compound **54** in  $\text{CD}_3\text{OD}$  at 121.44 MHz.

### Compound 65

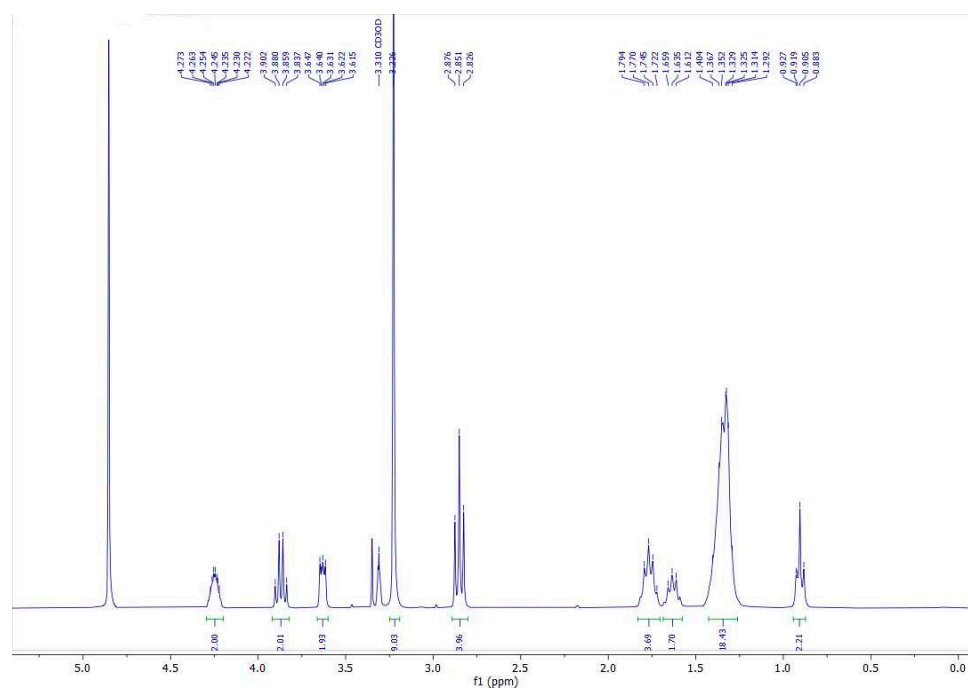

Figure S46.  $^1\text{H}$ -NMR of compound **65** in  $\text{CD}_3\text{OD}$  at 600 MHz.

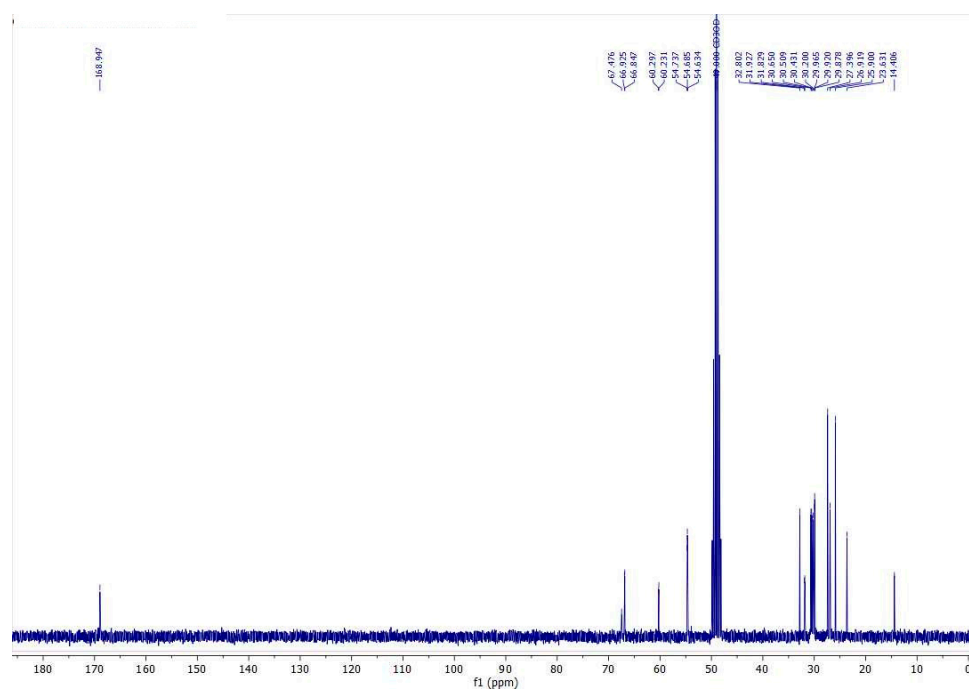

Figure S47.  $^{13}\text{C}$ -NMR of compound 65 in  $\text{CD}_3\text{OD}$  at 150 MHz.

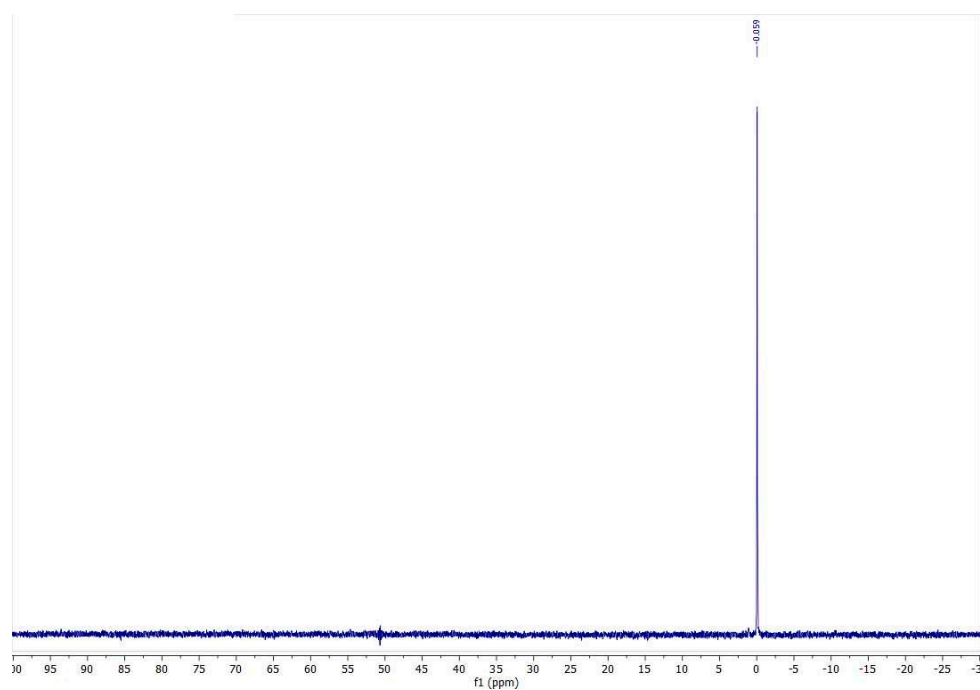

Figure S48.  $^{31}\text{P}$ -NMR of compound 65 in  $\text{CD}_3\text{OD}$  at 121.44 MHz.

## Compound 66

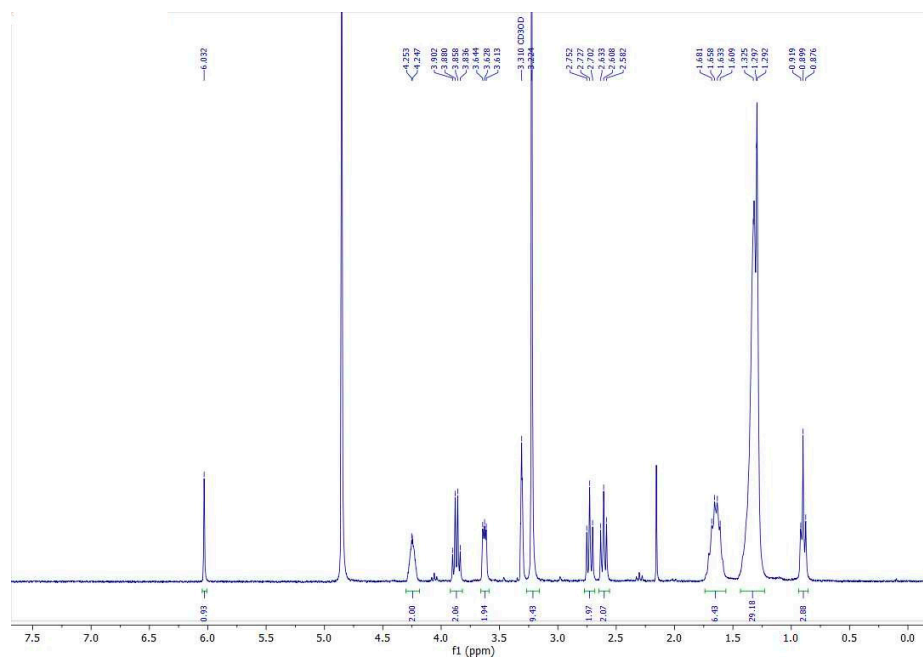**Figure S49.** <sup>1</sup>H-NMR of compound 66 in CD<sub>3</sub>OD at 600 MHz.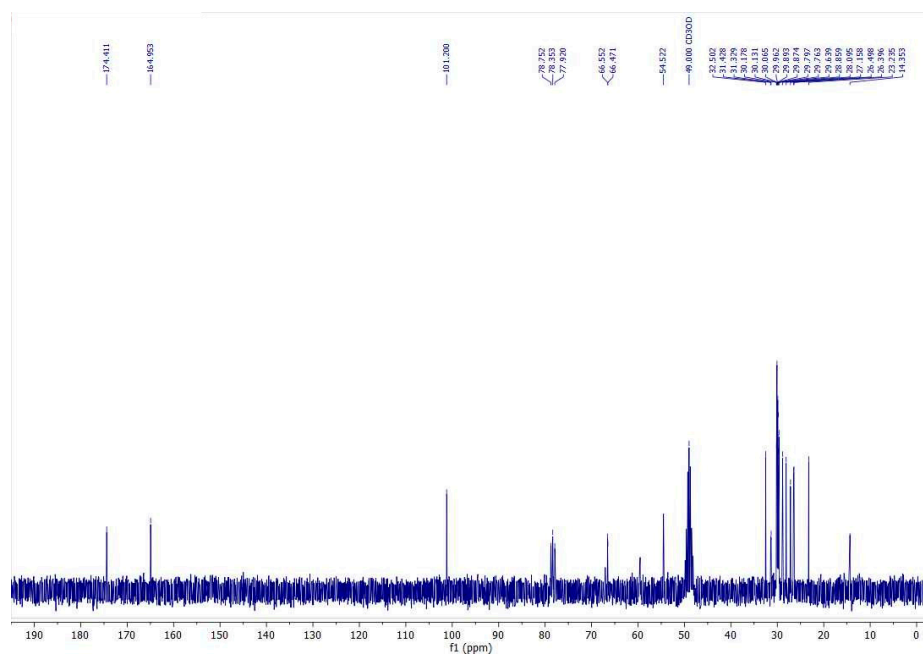**Figure S50.** <sup>13</sup>C-NMR of compound 66 in CD<sub>3</sub>OD at 150 MHz.

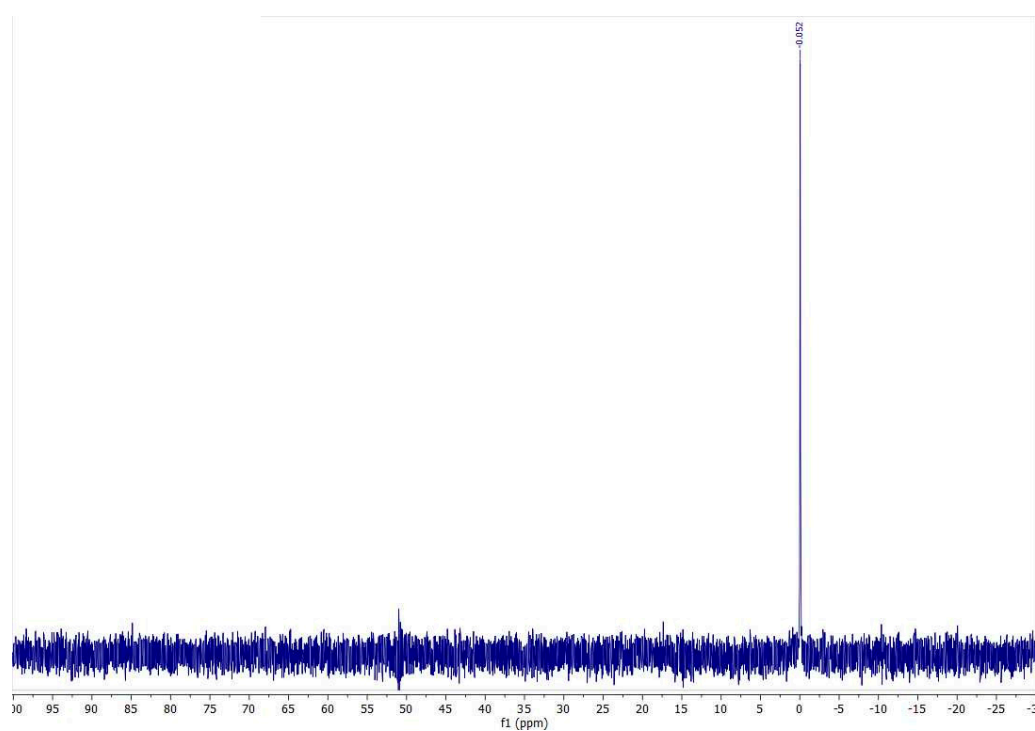

**Figure S51.**  $^{31}\text{P}$ -NMR of compound **66** in  $\text{CD}_3\text{OD}$  at 121.44 MHz.
